# Supplementary material
Source: PubMed Central journal article supplement (PMC1688860)
Supplement: 9474794s1.pdf [file 9474794s1.pdf]

This is an appendix to the paper by M. J. G. Gage (1998) Mammalian sperm morphometry. *Proc. R. Soc. Lond. B* **264**.

## DATA TABLE

Data on sperm morphometry, body weight, chromosome number, genome mass and oestrous duration across mammals. All sperm morphometry measures are in micrograms. Codes: tot l, total sperm length; head l, head length; head w, head width; mid l, mid-piece length; mid w, mid-piece diameter; flag w, flagellum diameter (to the extent of the outer dense fibres); mit vol, volume of mid-piece occupied by the mitochondrial sheath; source, reference sources (see list below); b wt, body weight in grams (weights were derived from: Nowak 1991; Macdonald 1995; Strahan 1991); chrom, chromosome number; gen m, genome mass in picograms per diploid nucleus (karyotypic information was derived from: Altmann & Dittmer 1972; Hsu & Benirschke 1967--1976; Manfredi Romanini 1985; Olmo 1983); oest, oestrous duration in hours (derived from: Asdell 1964; Hayssen *et al.* 1993; Hosken 1997).

### Body weight, karyotype and oestrous references

Altman, P. L. & Dittmer, D. S. 1972 *Biology data book*, 2nd edn, vol. 6. Bethesda, MD: Federation of American Societies for Experimental Biology.

Asdell, S. A. 1964 *Patterns of mammalian reproduction*, 2nd edn. Ithaca, NY: Cornell University Press.

Hayssen, V., Van Tienhoven, A. & Van Tienhoven, A. 1993 *Asdell's patterns of mammalian reproduction: a compendium of species-specific data*. Ithaca, NY: Comstock Publishing Associates.

Hosken, D. 1997 Sperm competition in bats. *Proc. R. Soc. Lond. B* **264**, 385--392.

Hsu, T. C. & Benirschke, K. 1967--1976 *An atlas of mammalian chromosomes*, vol. 1--10. New York: Springer.

Macdonald, D. W. 1995 *The encyclopaedia of mammals*. Oxford: Andromeda.

Manfredi Romanini, G. M. 1985 The nuclear content of deoxyribonucleic acid and some problems of mammalian phylogenies. *Mammalia* **49**, 369--385.

Nowak, R. M. 1991 *Walker's mammals of the world*, 5th edn, vol. 1 & 2. Baltimore, MD: Johns Hopkins University Press.

Olmo, E. 1983 Nucleotype and cell size in vertebrates: a review. *Bas. Appl. Histochem.* **27**, 227--256.

Strahan R. 1991 *The Australian museum complete book of Australian mammals*. Australia: Collins, Angus & Robertson.

## Sperm morphometry references

1. Cummins, J. M. & Woodall, P. F. 1985 On mammalian sperm dimensions. *J. Reprod. Fert.* **75**, 153--175.
2. Jones, R. C., Stone, G. M. & Zupp, J. 1992 Reproduction in the male echidna. In *Platypus and echidnas* (ed. M. L. Augée), pp. 115--126. Sydney, Australia: The Royal Zoological Society of NSW.
3. Carrick, F. N. & Hughes, R. L. 1982 Aspects of the structure and development of monotreme spermatozoa and their relevance to the evolution of mammalian sperm morphology. *Cell Tissue Res.* **222**, 127--141.
4. Temple-Smith, P. D. & Bedford, J. M. 1980 Sperm maturation and the formation of sperm pairs in the epididymis of the opossum *Didelphis virginiana*. *J. Exp. Zool.* **214**, 161--171.
5. Temple-Smith, P. D. 1994 Comparative structure and function of marsupial sperm. In *Marsupial reproduction: gametes, fertilization and early development*. Australia: CSIRO.
6. Cummins, J. M. 1985 & 1995 Unpublished supplementary data to: Cummins, J. M. & Woodall, P. F. 1985 On mammalian sperm dimensions. *J. Reprod. Fert.* **75**, 153--175
7. Harding, H. R., Carrick, F. N. & Shorey, C. D. 1979 Special features of sperm structure and function in marsupials. In *The spermatozoon* (ed. D. W. Fawcett & J. M. Bedford), pp. 289--303. Baltimore, MD: Urban & Schwarzenberg.
8. Johnston, S., Daddow, L. & Carrick, F. 1995 Ultrastructural and light microscopic observations of mature epididymal spermatozoa and sperm maturation of the greater bilby, *Macrotis lagotis* (Metatheria, Mammalia). *Memoires du Museum National D'Histoire Naturelle* **166**, 397--407.
9. Harding, H. R., Carrick, F. N. & Shorey, C. D. 1981 Marsupial phylogeny: new indications from sperm ultrastructure and development in *Tarsipes spenserae*? *Search* **12**, 45--47.
10. Cetica, P., Sassaroli, J., Merani, M. S. & Solari, A. 1993 Comparative spermatology in Dasypodidae (*Priodontes maximus*, *Chaetophractus villosus* and *Dasypus hybridus*). *Biocell* **18**, 89--103.
11. Bawa, S. R. 1963 Outer coarse fibers of the mammalian sperm tail—;an electron microscope study. *J. Ultrastr. Res.* **9**, 475--483.
12. Baskevich, M. I. & Lavrenchenko, L. A. 1994 On the morphology of spermatozoa in some African murines (Rodentia, Muridae): the taxonomic and phylogenetic aspects. *J. Zool. Syst. Evol. Res.* **33**, 9--16.

13. Breed, W. G. 1995 Spermatozoa of murid rodents from Africa: morphological diversity and evolutionary trends. *J. Zool. Lond.* **237**, 625--651.
14. Vitullo, A. D., Roldan, E. R. S. & Merani, M. S. 1988 On the morphology of spermatozoa of tuco-tucos, *Ctenomys* (Rodentia: Ctenomyidae): new data and its implications for the evolution of the genus. *J. Zool. Lond.* **215**, 675--683.
15. Feito, R. & Gallardo, M. 1982 Sperm morphology of the Chilean species of *Ctenomys* (Octodontidae). *J. Mamm.* **63**, 658--661.
16. Dott, H. M. & Skinner, J. D. 1989 Collection, examination and storage of spermatozoa from some South African mammals. *S. Afr. J. Zool.* **24**, 151--160.
17. Feito, R. & Gallardo, M. 1976 Notes on the sperm morphology of *Ctenomys maulinus* (Rodentia, Octodontidae). *Experientia* **32**, 734--735.
18. Jelinek, P. & Veznick, Z. 1984 An evaluation of spermatogenic activity of the testes in nutrias from histological preparations of germinal epithelium. *Acta Uni. Agric., Fac. Agron., Brno* **32**, 171--183.
19. Breed, W. G. & Aplin, K. P. 1994 Sperm morphology of murid rodents from New Guinea and the Solomon Islands: phylogenetic implications. *Aust. J. Zool.* **43**, 17--30.
20. Byeong Gug Yang, Hyun Deok Jeong & Hung Sun Koh 1991 Sperm morphology of two species of the genus *Apodemus* (Rodentia, Mammalia) in Korea. *Korean J. Zool.* **34**, 59--63.
21. Breed, W. G. & Musser, G. G. 1991 Sulawesi and Philippine rodents (Muridae): a survey of spermatozoal morphology and its significance for phylogenetic inference. *Am. Mus. Novitates* **3003**, 1--15.
22. Phillips, D. M. 1970 Ultrastructure of spermatozoa of the woolly opossum *Caluromys philander*. *J. Ultrastr. Res.* **33**, 381--397.
23. Nagy, F. 1994 On the ultrastructure of the spermatozoa in the Siberian hamster (*Phodopus sungorus campbelli*). *J. Submicrosc. Cytol. Pathol.* **26**, 533--544.
24. Woodall, P. F., Pavlov, P. & Tolley, L. K. 1993 Comparative dimensions of testes, epididymides and spermatozoa of Australian dingoes (*Canis familiaris dingo*) and domestic dogs (*Canis familiaris familiaris*): some effects of domestication. *Aust. J. Zool.* **41**, 133--140.
25. Woodall, P. F. & FitzGibbon, C. 1995 Ultrastructure of spermatozoa of the yellow-rumped elephant shrew *Rhynchocyon chrysopygus* (Mammalia: Macroscelidea) and the phylogeny of elephant shrews. *Acta Zool.* **76**, 19--23.
26. Shang Enyan, Ji Weizhi, Yang Shangchuan, Chen Jianchun & Zou Rujin 1993 Electron microscopical study of Tibetan macaque (*Macaca thibetana*) sperm. *Zool. Res.* **14**, 1--4.

27. Mori, T, Arai, S, Shiraishi, S. & Uchida, T. A. 1991 Ultrastructural observations on spermatozoa of the Soricidae, with special attention to a subfamily revision of the Japanese water shrew *Chimarrogale himalayica*. *J. Mamm. Soc. Japan* **16**, 1--12.
28. Van der Horst, G., Curry, P. T., Kitchin, R. M., Burgess, W., Thorne, E. T., Kwiatowski, D., Parker, M. & Atherton, R. W. 1991 Quantitative light and scanning electron microscopy of ferret sperm. *Molec. Reprod. Dev.* **30**, 232--240.
29. Hao, Y. 1993 Morphological observations and reproduction function analysis on the structure of semen of golden leopard. *Chinese Wildl.* **1**, 40--42.
30. Patterson, M. C., Stover, J., Westrom, W. K. & Schaffer, N. S. 1985 Comparative dimensional analysis of spermatozoa of seven species of Cervidae. *J. Zoo Anim. Med.* **18**, 144--146.
31. Ackerman, D. J., Reinecke, A. J. & Els, H. J. 1994 The ultrastructure of spermatozoa of African buffalo (*Syncerus caffer*) in the Kruger National Park. *Anim. Reprod. Sci.* **36**, 87--101.
32. Van der Horst, G., Jacobs, S. & Van Aswegen, G. 1987 SEM of sperm in the testis and wolffian duct of the African elephant, *Loxodonta africana*. *EM Soc. S. Afr. Proc.* **17**, 79--80.
33. Tingari, M. D. 1991 Studies on camel semen. III. Ultrastructure of the spermatozoon. *Anim. Reprod. Sci.* **26**, 333--344.
34. Hadek, R. 1969 *Mammalian fertilization. An atlas of ultrastructure*. New York: Academic Press.
35. Rouse, G. W. & Robson, S. K. 1986 An ultrastructural study of megachiropteran (Mammalia: Chiroptera) spermatozoa: implications for chiropteran phylogeny. *J. Submicrosc. Cytol.* **18**, 137--152.
36. Olson, G. E. & Linck, R. W. 1977 Observations of the structural components of flagellar axonemes and central pair microtubules from rat sperm. *J. Ultrastr. Res.* **61**, 21--43.
37. Breed, W. G. & Leigh, C. M. 1992 Marsupial fertilization: some further ultrastructural observations on the dasyurid *Sminthopsis crassicaudata*. *Molec. Reprod. Dev.* **32**, 277--292.
38. Woodall, P. F. 1991 An ultrastructural study of the spermatozoa of elephant shrews (Mammalia: Macroscelidea) and its phylogenetic implications. *J. Submicrosc. Cytol. Pathol.* **23**, 47--58.
39. Saacke, R. G. & Almquist, J. O. 1964 Ultrastructure of bovine spermatozoa. II. The neck and tail of normal ejaculated sperm. *Am. J. Anat.* **115**, 163--184.

40. Moore, H. D. M., Hartman, T. D. & Holt, W. V. 1984 The structure and epididymal maturation of the spermatozoon of the common marmoset (*Callithrix jacchus*). *J. Anat.* **138**, 227--235.
41. Fawcett, D. W. 1970 A comparative view of sperm ultrastructure. *Biol. Reprod.* **2**, 90--127(s).
42. Bedford, J. M. 1967 Observations on the fine structure of spermatozoa of the bush baby (*Galago senegalensis*), the African green monkey (*Cercopithecus aethiops*) and man. *Am. J. Anat.* **121**, 425--442.
43. Fawcett, D. W. & Ito, S. 1965 The fine structure of bat spermatozoa. *Am. J. Anat.* **116**, 567--610.
44. Bedford, J. M. & Hoskins, D. D. 1990 The mammalian spermatozoon: morphology, biochemistry and physiology. In *Marshall's physiology of reproduction. II. Reproduction in the male* (ed. G. E. Lamming), pp. 379--568. UK: Longman.
45. Vitale-Calpe, R. & Burgos, M. H. 1970 The mechanism of spermiation in the hamster. II. The ultrastructural effects of coitus and of LH administration. *J. Ultrastr. Res.* **31**, 394--406.
46. Olds, P. J. 1971 Effect of the T-locus on sperm ultrastructure in the house mouse. *J. Anat.* **109**, 31--37.
47. Phillips, D. M. 1977 Mitochondrial disposition in mammalian spermatozoa. *J. Ultrastr. Res.* **58**, 144--154.
48. Bishop, M. W. H. & Austin, C. R. 1957 Mammalian spermatozoa. *Endeavour* **16**, 137--150.
49. Breed, W. G. 1983 Variation in sperm morphology in the Australian rodent genus, *Pseudomys* (Muridae). *Cell Tissue Res.* **229**, 611--625.
50. Pl&ouml;n, L., Ekwall, H. & Afzelius, B. 1979 Spermiogenesis and the spermatozoa of the European common shrew. *J. Ultrastr. Res.* **68**, 149--159.
51. Koehler, J. K. 1977 Fine structure of spermatozoa of the Asiatic musk shrew *Suncus murinus*. *Am. J. Anat.* **149**, 135--152.
52. Castellani-Ceresa, L., Cotelli, F., Lora-Lamia, C. & Berruti, G. 1980 The spermatozoon of *Talpa europaea* with particular reference to the acrosome region. *J. Ultrastr. Res.* **72**, 112--118.
53. Temple-Smith, P. D. & Bedford, J. M. 1976 The features of sperm maturation in the epididymis of a marsupial, the brush-tailed possum *Trichosurus vulpecula*. *Am. J. Anat.* **147**, 471--500.

54. Breed, W. G. & Yong, H. S. 1986 Sperm morphology of murid rodents from Malaysia and its possible phylogenetic significance. *Am. Mus. Novitates* **2856**, 1--12.

| species                          | tot l | head l | head w | mid l | mid w | flag w | mit vol | flag l | source  | b wt  | chrom | gen m | oest |
|----------------------------------|-------|--------|--------|-------|-------|--------|---------|--------|---------|-------|-------|-------|------|
| <b>MONOTREMATA</b>               |       |        |        |       |       |        |         |        |         |       |       |       |      |
| <b>Tachyglossidae</b>            |       |        |        |       |       |        |         |        |         |       |       |       |      |
| <i>Tachyglossus aculeatus</i>    | 122   | 50.4   | -      | 6.0   | -     | -      | -       | 64.8   | 1,2,3   | 3819  | 64    | 7.4   | 492  |
| <b>Ornithorhynchidae</b>         |       |        |        |       |       |        |         |        |         |       |       |       |      |
| <i>Ornithorhynchus anatinus</i>  | 112   | 43.0   | -      | 5.0   | 0.56  | 0.22   | 1.04    | 54.0   | 1,3     | 1326  | 54    | 7.88  | -    |
| <b>MARSUPIALIA</b>               |       |        |        |       |       |        |         |        |         |       |       |       |      |
| <b>Didelphidae</b>               |       |        |        |       |       |        |         |        |         |       |       |       |      |
| <i>Caluromys philander</i>       | 47.85 | 5.0    | -      | 11.0  | 3.03  | 0.53   | 76.37   | 31.9   | 22      | -     | -     | -     | -    |
| <i>Didelphis virginiana</i>      | -     | 6.1    | 1.3    | 7.3   | 2.12  | 0.67   | 23.23   | -      | 4       | 2196  | 22    | -     | 66   |
| <i>Monodelphis domestica</i>     | 211.9 | 7.7    | -      | 7.3   | -     | -      | -       | 197.3  | 5       | 85    | -     | -     | 142  |
| <b>Dasyuridae</b>                |       |        |        |       |       |        |         |        |         |       |       |       |      |
| <i>Antechinus stuartii</i>       | 271.1 | 11.4   | -      | -     | -     | -      | -       | -      | 6       | 31    | -     | -     | -    |
| <i>Dasyercus cristicauda</i>     | -     | 9.5    | 1.9    | -     | -     | -      | -       | -      | 1       | 100   | -     | -     | -    |
| <i>Dasykulata rosamondae</i>     | -     | 9.8    | 1.6    | -     | -     | -      | -       | -      | 1       | 29    | -     | -     | -    |
| <i>Dasyuroides byrnei</i>        | 254.7 | 12.7   | 2.5    | 40.7  | 3.10  | -      | -       | 201.4  | 1       | 11    | -     | -     | -    |
| <i>Dasyurus viverrinus</i>       | -     | 11.0   | 1.9    | -     | 1.95  | 1.47   | -       | -      | 1,7     | 1049  | -     | -     | -    |
| <i>Sarcophilus harrisi</i>       | 218.4 | 11.1   | 2.2    | 34.4  | 2.60  | -      | -       | 173.3  | 1       | 7001  | 14    | 7.4   | -    |
| <i>Sminthopsis crassicaudata</i> | 264.9 | 12.8   | -      | -     | 1.15  | -      | -       | -      | 5,37    | 15    | 14    | 7.52  | -    |
| <b>Myrmecobiidae</b>             |       |        |        |       |       |        |         |        |         |       |       |       |      |
| <i>Myrmecobius fasciatus</i>     | 138.4 | 10.9   | -      | 20.4  | -     | -      | -       | 106.8  | 5       | 455   | -     | -     | -    |
| <b>Peramelidae</b>               |       |        |        |       |       |        |         |        |         |       |       |       |      |
| <i>Isoodon macrourus</i>         | 171.1 | 6.0    | -      | 10.7  | 2.03  | 0.98   | 26.36   | 155.0  | 5,7     | 1276  | 14    | 9.7   | -    |
| <i>Isoodon obesulus</i>          | 167   | 5.0    | -      | -     | -     | -      | -       | -      | 5       | 1057  | 14    | 9.63  | -    |
| <i>Macrotis lagotis</i>          | 149.4 | 13.2   | -      | 16.2  | -     | -      | -       | 120.5  | 8       | 1599  | 18    | 8.9   | -    |
| <i>Perameles nasuta</i>          | 199.7 | 5.7    | 3.0    | 14.0  | 2.00  | -      | -       | 180.1  | 1       | 975   | 14    | 9.36  | -    |
| <b>Petauridae</b>                |       |        |        |       |       |        |         |        |         |       |       |       |      |
| <i>Petaurus breviceps</i>        | 107.1 | 5.7    | 2.2    | 8.3   | 1.40  | -      | -       | 93.0   | 1       | 13    | -     | -     | -    |
| <i>Petaurus norfolcensis</i>     | -     | 4.1    | 2.3    | -     | 1.47  | 0.37   | -       | -      | 1,7     | 23    | -     | -     | -    |
| <i>Pseudocheirus cupreus</i>     | 90.1  | 5.4    | 2.6    | 6.2   | 1.50  | -      | -       | 78.5   | 1       | -     | -     | -     | -    |
| <i>Pseudocheirus peregrinus</i>  | 112.7 | 5.9    | 3.8    | 6.9   | 2.90  | 0.30   | 45.09   | 100.0  | 1,7     | 900   | -     | -     | -    |
| <b>Vombatidae</b>                |       |        |        |       |       |        |         |        |         |       |       |       |      |
| <i>Lasiorhinus latrifons</i>     | 79.5  | 7.5    | -      | 22.0  | -     | -      | -       | 50.0   | 1       | 25488 | 14    | 8.76  | -    |
| <i>Vombatus ursinus</i>          | 93.6  | 5.7    | -      | 18.0  | -     | -      | -       | 69.8   | 1,5     | 26003 | -     | 8.61  | -    |
| <b>Phascolarctidae</b>           |       |        |        |       |       |        |         |        |         |       |       |       |      |
| <i>Phascolarctos cinereus</i>    | 83    | 11.8   | -      | 9.6   | 0.86  | 0.34   | 4.78    | 61.8   | 1,5,7   | 6587  | 16    | 7.96  | -    |
| <b>Macropodidae</b>              |       |        |        |       |       |        |         |        |         |       |       |       |      |
| <i>Aepyprymnus rufescens</i>     | 99    | 5.3    | -      | 11.7  | -     | -      | -       | 82.0   | 5       | 3251  | -     | -     | -    |
| <i>Dendrolagus matschiei</i>     | 105.2 | 8.0    | -      | 15.7  | -     | -      | -       | 81.5   | 5       | 7427  | -     | -     | -    |
| <i>Macropus agilis</i>           | 113.2 | 7.3    | 2.5    | 9.3   | 1.34  | -      | -       | 97.0   | 1       | 15002 | -     | -     | -    |
| <i>Macropus eugenii</i>          | 106   | 7.0    | -      | 11.0  | -     | -      | -       | 88.1   | 1,5     | 6502  | -     | -     | 12   |
| <i>Macropus giganteus</i>        | 118.9 | 7.3    | 2.2    | 10.7  | 1.50  | -      | -       | 100.9  | 1       | 22628 | 16    | 8.79  | -    |
| <i>Macropus parma</i>            | -     | 5.3    | 1.4    | -     | -     | -      | -       | -      | 1       | 3501  | -     | -     | -    |
| <i>Macropus parryi</i>           | 119.5 | 9.3    | 4.9    | 10.1  | 1.43  | -      | -       | 100.2  | 1       | 13506 | -     | -     | -    |
| <i>Macropus robustus</i>         | -     | 4.5    | 1.5    | -     | -     | -      | -       | -      | 1       | 21268 | 16    | 9.3   | -    |
| <i>Macropus rufus</i>            | 124   | 5.1    | 3.4    | 7.9   | 1.40  | -      | -       | 116.0  | 1       | 46257 | -     | -     | -    |
| <i>Petrogale xanthopus</i>       | 101.2 | 7.7    | -      | 12.3  | -     | -      | -       | 81.3   | 5       | 6502  | -     | -     | -    |
| <i>Potorous tridactylus</i>      | 165.8 | 9.8    | -      | 18.9  | 1.76  | 0.59   | 40.80   | 137.4  | 5,7     | 954   | 12    | 8.52  | -    |
| <i>Thylogale stigmatica</i>      | 110.3 | 7.2    | 2.2    | 10.9  | 1.50  | -      | -       | 92.2   | 1       | 4651  | -     | -     | -    |
| <i>Wallabia bicolor</i>          | 109.5 | 7.8    | 3.1    | 8.9   | 1.45  | -      | -       | 92.2   | 1       | 15002 | -     | -     | -    |
| <b>Phalangeridae</b>             |       |        |        |       |       |        |         |        |         |       |       |       |      |
| <i>Trichosurus vulpecula</i>     | 94    | 12.8   | 6.7    | 22.6  | 1.35  | 0.49   | 28.15   | 78.0   | 1,5,7   | 2877  | -     | -     | -    |
| <b>Tarsipidae</b>                |       |        |        |       |       |        |         |        |         |       |       |       |      |
| <i>Tarsipes rostratus</i>        | 349.4 | 12.3   | -      | 88.5  | 1.54  | 1.03   | 91.87   | 248.6  | 1,5,6,9 | 9     | -     | -     | -    |
| <b>EDENTATA</b>                  |       |        |        |       |       |        |         |        |         |       |       |       |      |
| <b>Bradyrodidae</b>              |       |        |        |       |       |        |         |        |         |       |       |       |      |
| <i>Bradyrodus cuculliger</i>     | 31    | -      | -      | -     | -     | -      | -       | -      | 1       | 3633  | -     | -     | -    |
| <b>Dasyrodidae</b>               |       |        |        |       |       |        |         |        |         |       |       |       |      |
| <i>Cabassous unicinctus</i>      | 98    | 18.0   | -      | 20.0  | -     | -      | -       | 60.0   | 6       | 4802  | -     | -     | -    |
| <i>Chaetophractus villosus</i>   | 71    | 12.1   | 10.1   | 13.0  | 1.03  | 0.59   | 7.28    | 46.0   | 10      | 4540  | -     | -     | -    |
| <i>Dasymys incomtus</i>          | -     | 9.0    | 2.0    | -     | -     | -      | -       | -      | -       | 92    | -     | -     | -    |
| <i>Dasymys hybridus</i>          | 63.1  | 6.6    | 3.8    | 16.0  | -     | -      | -       | 40.9   | 10      | 1499  | -     | -     | -    |
| <i>Dasymys novemcinctus</i>      | 68    | 9.0    | -      | 14.5  | -     | -      | -       | 45.0   | 1       | 5715  | 64    | -     | -    |
| <i>Priodontes maximus</i>        | 79.9  | 13.2   | 11.6   | -     | -     | -      | -       | -      | 10      | 40014 | -     | -     | -    |
| <b>PHOLIDOTA</b>                 |       |        |        |       |       |        |         |        |         |       |       |       |      |
| <b>Manidae</b>                   |       |        |        |       |       |        |         |        |         |       |       |       |      |
| <i>Manis tricuspis</i>           | 71.6  | 8.1    | 2.5    | 14.0  | -     | -      | -       | 49.5   | 6       | -     | -     | -     | -    |

| species                         | tot l | head l | head w | mid l | mid w | flag w | mit vol | flag l | source    | b wt | chrom | gen m | oest |
|---------------------------------|-------|--------|--------|-------|-------|--------|---------|--------|-----------|------|-------|-------|------|
| <b>LAGOMORPHA</b>               |       |        |        |       |       |        |         |        |           |      |       |       |      |
| <b>Leporidae</b>                |       |        |        |       |       |        |         |        |           |      |       |       |      |
| <i>Bunolagus monticularis</i>   | -     | 6.6    | 3.6    | -     | -     | -      | -       | -      | 1         | 1250 | -     | -     | -    |
| <i>Lepus capensis</i>           | -     | 7.0    | 4.6    | -     | -     | -      | -       | -      | 1,16      | 2300 | -     | -     | -    |
| <i>Lepus saxatilis</i>          | -     | 6.7    | 3.7    | -     | -     | -      | -       | -      | 1         | -    | -     | -     | -    |
| <i>Oryctolagus cuniculus</i>    | 56.5  | 8.5    | -      | 8.4   | 0.78  | 0.44   | 2.71    | 39.4   | 1,6,11,34 | 1535 | 44    | 7.34  | -    |
| <i>Pronolagus randensis</i>     | -     | 6.6    | 3.7    | -     | -     | -      | -       | -      | 1         | 2200 | -     | -     | -    |
| <i>Pronolagus rupestris</i>     | -     | 6.8    | 3.7    | -     | -     | -      | -       | -      | 1         | 2200 | -     | -     | -    |
| <b>RODENTIA</b>                 |       |        |        |       |       |        |         |        |           |      |       |       |      |
| <b>Aplodontidae</b>             |       |        |        |       |       |        |         |        |           |      |       |       |      |
| <i>Aplodontia rufa</i>          | 100   | -      | -      | -     | -     | -      | -       | -      | 1         | 1100 | -     | -     | -    |
| <b>Pedetidae</b>                |       |        |        |       |       |        |         |        |           |      |       |       |      |
| <i>Pedetes capensis</i>         | -     | 6.7    | 4.9    | -     | -     | -      | -       | -      | 16        | 3010 | -     | -     | -    |
| <b>Muridae</b>                  |       |        |        |       |       |        |         |        |           |      |       |       |      |
| <i>Acomys cahirinus</i>         | 124   | 7.7    | 2.6    | 34.5  | -     | -      | -       | 100.0  | 12,13     | 36   | 38    | 5.47  | -    |
| <i>Aethomys chrysophilusa</i>   | 130.5 | 11.0   | 5.0    | 26.0  | 1.28  | 0.47   | 28.94   | 93.5   | 13,16     | 79   | -     | -     | -    |
| <i>Aethomys chrysophilusb</i>   | 75.5  | 5.0    | 5.0    | 16.0  | -     | -      | -       | 54.5   | 13,16     | 79   | -     | -     | -    |
| <i>Aethomys hindei</i>          | -     | 11.0   | 3.0    | -     | -     | -      | -       | -      | 13        | 107  | -     | -     | -    |
| <i>Aethomys kaiseri</i>         | 132   | 8.0    | 3.5    | 27.0  | -     | -      | -       | 97.0   | 13        | 20   | -     | -     | -    |
| <i>Aethomys namaquensis</i>     | 102.5 | 10.0   | 3.0    | 20.0  | -     | -      | -       | 72.5   | 6         | 48   | -     | -     | -    |
| <i>Aethomys nyikae</i>          | 105   | 10.0   | 2.5    | 30.0  | -     | -      | -       | 65.0   | 13        | -    | -     | -     | -    |
| <i>Akodon azarae</i>            | 94.5  | -      | -      | -     | -     | -      | -       | -      | 6         | 25   | 38    | 5.06  | -    |
| <i>Akodon dolores</i>           | 81.6  | -      | -      | -     | -     | -      | -       | -      | 6         | -    | 38    | 5.7   | -    |
| <i>Akodon molinae</i>           | 76.5  | -      | -      | -     | -     | -      | -       | -      | 6         | 33   | 44    | 6.08  | -    |
| <i>Anisomys imitator</i>        | 159   | 15.0   | 5.5    | 37.0  | -     | -      | -       | 107.0  | 19        | 510  | -     | -     | -    |
| <i>Apodemus agrarius</i>        | 109.8 | 8.0    | -      | 24.8  | 0.65  | 0.16   | 7.73    | 77.0   | 20        | 22   | 48    | 6.49  | -    |
| <i>Apodemus flavicollis</i>     | 125.3 | 8.8    | -      | 23.0  | 1.00  | 0.29   | 16.54   | 93.0   | 1         | 23   | 48    | 6.72  | -    |
| <i>Apodemus peninsulae</i>      | 102.8 | 7.9    | -      | 24.9  | -     | -      | -       | 69.9   | 20        | 33   | -     | -     | -    |
| <i>Apodemus sylvaticus</i>      | 133.8 | 9.8    | -      | 24.0  | -     | -      | -       | 100.0  | 1         | 18   | 48    | 7.11  | -    |
| <i>Arvicanthis abyssinicus</i>  | -     | 9.9    | 3.5    | -     | -     | -      | -       | -      | 12        | 10   | -     | -     | -    |
| <i>Arvicanthis dembeensis</i>   | -     | 10.0   | 3.5    | -     | -     | -      | -       | -      | 12        | -    | -     | -     | -    |
| <i>Arvicanthis somalicus</i>    | -     | 6.4    | 3.8    | -     | -     | -      | -       | -      | 12        | -    | -     | -     | -    |
| <i>Bandicota bengalensis</i>    | 149.5 | 11.5   | -      | 43.0  | -     | -      | -       | 95.0   | 6,54      | 200  | -     | -     | 44   |
| <i>Berylmys bowersii</i>        | 196.9 | 12.0   | -      | -     | -     | -      | -       | 185.1  | 1,6,54    | 391  | -     | -     | -    |
| <i>Bolomys obscurus</i>         | 74.6  | -      | -      | -     | -     | -      | -       | -      | 6         | -    | -     | -     | -    |
| <i>Bunomys andrewsi</i>         | 163   | 8.0    | 2.5    | -     | -     | -      | -       | 155.0  | 21        | 125  | -     | -     | -    |
| <i>Bunomys chrysocomus</i>      | 170.6 | 10.5   | 2.0    | -     | -     | -      | -       | 159.9  | 21        | 116  | -     | -     | -    |
| <i>Bunomys penitus</i>          | 145.1 | 10.0   | 2.5    | -     | -     | -      | -       | -      | 21        | 170  | -     | -     | -    |
| <i>Calomys callidus</i>         | 71.3  | 6.2    | -      | 20.0  | -     | -      | -       | 48.2   | 6         | 45   | 36    | 5.84  | 36   |
| <i>Calomys laucha</i>           | 50.1  | 6.0    | -      | 10.6  | -     | -      | -       | 33.5   | 6         | 20   | 60    | 6.05  | -    |
| <i>Calomys musculus</i>         | 69    | 6.0    | -      | 14.5  | -     | -      | -       | 48.6   | 6         | 20   | -     | -     | -    |
| <i>Chiropodomys gliroides</i>   | 112   | 10.0   | -      | 22.0  | -     | -      | -       | 80.0   | 1,6,54    | 25   | -     | -     | -    |
| <i>Chiruromys vates</i>         | 163   | 11.0   | 2.5    | 50.0  | -     | -      | -       | 102.0  | 19        | 46   | -     | -     | -    |
| <i>Chrotomys mindorensis</i>    | 143.5 | 8.5    | 2.4    | -     | -     | -      | -       | -      | 21        | -    | -     | -     | -    |
| <i>Clethrionomys glareolus</i>  | 86.7  | 2.1    | -      | 3.0   | -     | -      | -       | 59.0   | 1         | 27   | 56    | 5.86  | -    |
| <i>Coccymys ruemmleri</i>       | -     | 10.5   | 2.0    | -     | -     | -      | -       | -      | 19        | -    | -     | -     | -    |
| <i>Conilurus penicillatus</i>   | 124   | 7.0    | -      | 21.0  | -     | -      | -       | 96.0   | 1         | 150  | -     | -     | -    |
| <i>Cricetulus griseus</i>       | 258.3 | 12.7   | -      | 103.1 | 1.17  | 0.79   | 59.30   | 142.6  | 1,6,41    | -    | 22    | 7.5   | 36   |
| <i>Crunomys celebensis</i>      | 60    | 8.0    | 4.0    | -     | -     | -      | -       | -      | 21        | 55   | -     | -     | -    |
| <i>Echiothrix leucura</i>       | 195   | 15.0   | 2.0    | -     | -     | -      | -       | -      | 21        | -    | -     | -     | -    |
| <i>Eropeplus canus</i>          | 86    | 6.0    | 5.0    | -     | -     | -      | -       | -      | 21        | -    | -     | -     | -    |
| <i>Grammomys gazellae</i>       | 127   | 10.0   | 4.0    | 22.0  | -     | -      | -       | 95.0   | 13        | -    | -     | -     | -    |
| <i>Habdomys pumilio</i>         | 114   | 9.0    | 2.5    | 20.0  | -     | -      | -       | 85.0   | 13        | 42   | -     | -     | 110  |
| <i>Haeromys minahassae</i>      | 124.5 | 9.5    | 4.0    | -     | -     | -      | -       | -      | 21        | 15   | -     | -     | -    |
| <i>Hapalomys longicaudatus</i>  | 108.9 | 12.0   | -      | 37.0  | -     | -      | -       | 72.0   | 1,6,54    | 104  | -     | -     | -    |
| <i>Hydromys chrysogaster</i>    | 115   | 7.0    | -      | 20.0  | -     | -      | -       | 88.0   | 1         | 680  | -     | -     | -    |
| <i>Hyomys goliath</i>           | 137.5 | 9.5    | 4.0    | 28.0  | -     | -      | -       | 100.0  | 19        | 816  | -     | -     | -    |
| <i>Leggadina forresti</i>       | 128   | 7.0    | -      | 26.0  | -     | -      | -       | 95.0   | 1         | 20   | -     | -     | -    |
| <i>Lemniscomys barbarus</i>     | 100   | 8.0    | 4.0    | 22.0  | -     | -      | -       | 70.0   | 13        | 48   | -     | -     | -    |
| <i>Lemniscomys macculus</i>     | -     | 9.2    | 4.3    | -     | -     | -      | -       | -      | 12        | -    | -     | -     | -    |
| <i>Lemniscomys striatus</i>     | 100   | 8.0    | 2.0    | 22.0  | -     | -      | -       | 70.0   | 13        | 39   | -     | -     | -    |
| <i>Lenomys meyeri</i>           | 66.3  | 6.3    | 3.5    | -     | -     | -      | -       | -      | 21        | -    | -     | -     | -    |
| <i>Lenothrix canus</i>          | 149.1 | 9.0    | -      | 45.0  | -     | -      | -       | 95.0   | 6,54      | 131  | -     | -     | -    |
| <i>Leopoldamys edwardsi</i>     | 171.9 | 12.5   | -      | -     | -     | -      | -       | -      | 6         | -    | -     | -     | -    |
| <i>Leopoldamys sabanus</i>      | 170.1 | 11.5   | -      | 67.0  | -     | -      | -       | 103.0  | 1,6       | -    | -     | -     | -    |
| <i>Leporillus conditor</i>      | 110.1 | 9.0    | -      | 23.0  | -     | -      | -       | 78.0   | 1         | 350  | -     | -     | -    |
| <i>Leptomys elegans</i>         | 138.5 | 10.5   | 3.0    | 28.0  | -     | -      | -       | 100.0  | 19        | 90   | -     | -     | -    |
| <i>Lophuromys flavopuntatus</i> | 67    | 6.0    | 6.0    | 14.0  | -     | -      | -       | 47.0   | 13        | 64   | -     | -     | -    |



| species                         | tot l | head l | head w | mid l | mid w | flag w | mit vol | flag l | source  | b wt | chrom | gen m | oest |
|---------------------------------|-------|--------|--------|-------|-------|--------|---------|--------|---------|------|-------|-------|------|
| <i>Lophuromys sikapusi</i>      | 61    | 8.0    | 7.0    | 11.0  | -     | -      | -       | 42.0   | 13      | 51   | -     | -     | -    |
| <i>Lophuromys woosnami</i>      | 66    | 7.0    | 3.5    | 17.0  | -     | -      | -       | 42.0   | 13      | -    | -     | -     | -    |
| <i>Lorentzimys nouhuysi</i>     | 137.9 | 10.0   | 2.0    | 20.0  | -     | -      | -       | 108.0  | 19      | 14   | -     | -     | -    |
| <i>Mallomys rothschildi</i>     | 158   | 11.0   | 2.0    | 32.0  | -     | -      | -       | 115.1  | 19      | 1160 | -     | -     | -    |
| <i>Margaretamys beccarii</i>    | 174.9 | 15.0   | 2.5    | -     | -     | -      | -       | -      | 19      | 70   | -     | -     | -    |
| <i>Margaretamys elegans</i>     | 183   | 15.0   | 3.0    | -     | -     | -      | -       | -      | 21      | 121  | -     | -     | -    |
| <i>Margaretamys parvus</i>      | 189   | 14.0   | 3.0    | -     | -     | -      | -       | -      | 21      | 33   | -     | -     | -    |
| <i>Mastomys coucha</i>          | 157.1 | 10.4   | 2.2    | 42.0  | -     | -      | -       | 105.0  | 1,12,13 | 54   | -     | -     | -    |
| <i>Mastomys erythroleucus</i>   | -     | 7.3    | 3.2    | -     | -     | -      | -       | -      | 12      | 45   | 38    | -     | -    |
| <i>Mastomys huberti</i>         | -     | 12.6   | 2.9    | -     | -     | -      | -       | -      | 12      | 66   | -     | -     | -    |
| <i>Mastomys natalensis</i>      | 147.4 | 16.0   | 2.0    | 48.0  | 0.68  | 0.40   | 11.26   | 89.0   | 1,6,13  | 46   | -     | -     | -    |
| <i>Mayermys ellermani</i>       | 123   | 9.0    | 3.0    | 22.0  | -     | -      | -       | 92.0   | 19      | -    | -     | -     | -    |
| <i>Maxomys hellwaldii</i>       | -     | -      | 2.0    | -     | -     | -      | -       | -      | 21      | 203  | -     | -     | -    |
| <i>Maxomys inas</i>             | 152.5 | 13.5   | -      | 32.0  | -     | -      | -       | 107.0  | 1,6,54  | 90   | -     | -     | -    |
| <i>Maxomys musschenbroekii</i>  | 142   | 12.0   | 4.0    | -     | -     | -      | -       | -      | 21      | 84   | -     | -     | -    |
| <i>Maxomys surifer</i>          | 115.5 | 10.5   | -      | 35.0  | -     | -      | -       | 70.0   | 1,6,54  | 174  | -     | -     | -    |
| <i>Maxomys whiteheadi</i>       | 137   | 12.0   | -      | 25.0  | -     | -      | -       | 100.0  | 1,6,54  | 52   | -     | -     | -    |
| <i>Melasmothrix naso</i>        | 114   | 9.0    | 3.0    | -     | -     | -      | -       | -      | 21      | 47   | -     | -     | -    |
| <i>Melomys lanosus</i>          | 148   | 12.0   | 2.5    | 24.0  | -     | -      | -       | 112.0  | 19      | 118  | -     | -     | -    |
| <i>Melomys leucogaster</i>      | 112   | 8.0    | 3.0    | 24.0  | -     | -      | -       | 80.0   | 19      | 109  | -     | -     | -    |
| <i>Melomys littoralis</i>       | 110   | 8.0    | -      | 22.0  | -     | -      | -       | 80.0   | 19      | -    | -     | -     | -    |
| <i>Melomys lutillus</i>         | 118   | 9.0    | 2.5    | 22.0  | -     | -      | -       | 87.0   | 19      | 53   | -     | -     | -    |
| <i>Melomys platyops</i>         | 118.9 | 9.0    | 3.0    | 32.0  | -     | -      | -       | 78.0   | 19      | 77   | -     | -     | -    |
| <i>Melomys rattoides</i>        | 139.1 | 12.0   | 2.5    | 22.0  | -     | -      | -       | 105.0  | 19      | 209  | -     | -     | -    |
| <i>Melomys rubex</i>            | 117   | 9.0    | 3.0    | 22.0  | -     | -      | -       | 86.0   | 19      | 48   | -     | -     | -    |
| <i>Melomys rufescens</i>        | 120.5 | 8.5    | 3.0    | 22.0  | -     | -      | -       | 90.0   | 19      | 58   | -     | -     | -    |
| <i>Mesocricetus auratus</i>     | 186.7 | 15.2   | -      | 50.5  | 0.98  | 0.42   | 30.82   | 126.4  | 1,6,45  | 105  | 44    | 7.66  | -    |
| <i>Micromys minutus</i>         | 63.7  | 5.7    | -      | 13.0  | -     | -      | -       | 45.0   | 1       | 8    | -     | -     | -    |
| <i>Microtus agrestis</i>        | 103.5 | 6.9    | -      | 27.4  | -     | -      | -       | 70.0   | 1       | 36   | 50    | 7.04  | -    |
| <i>Microtus ochrogaster</i>     | 94.4  | 7.9    | -      | 21.8  | -     | -      | -       | 64.7   | 1       | -    | -     | 5.71  | -    |
| <i>Microtus townsendii</i>      | -     | -      | -      | -     | 0.63  | 0.23   | -       | -      | 44      | 19   | -     | -     | 108  |
| <i>Mus mahomet</i>              | -     | 8.3    | 4.2    | -     | -     | -      | -       | -      | -       | 10   | -     | -     | -    |
| <i>Mus musculus</i>             | 123.6 | 8.1    | -      | 19.7  | 1.08  | 0.45   | 15.01   | 95.8   | 1,6,46  | 151  | 40    | 6.8   | -    |
| <i>Myomys albigipes</i>         | -     | 10.2   | 2.7    | -     | -     | -      | -       | -      | 12      | 49   | -     | -     | -    |
| <i>Myomys fumatus</i>           | -     | 8.0    | 3.1    | -     | -     | -      | -       | -      | 12      | 18   | -     | -     | -    |
| <i>Neofiber alleni</i>          | 74.9  | 4.9    | 3.0    | 21.0  | 0.80  | -      | -       | 48.9   | 1       | 27   | -     | -     | -    |
| <i>Neohydromys fuscus</i>       | -     | 9.0    | 3.0    | -     | -     | -      | -       | -      | 19      | 19   | -     | -     | -    |
| <i>Neotoma floridana</i>        | 138.8 | 8.1    | 1.5    | 0.9   | -     | -      | -       | -      | 1       | -    | 52    | 6.25  | -    |
| <i>Niviventer bukit</i>         | 151.5 | 11.5   | -      | 44.0  | -     | -      | -       | 96.0   | 1,6,54  | 76   | -     | -     | -    |
| <i>Niviventer cremoriventer</i> | 118.9 | 9.0    | -      | 35.0  | -     | -      | -       | 75.0   | 1,6,54  | 75   | -     | -     | -    |
| <i>Niviventer rapit</i>         | 142   | 12.0   | -      | 45.0  | -     | -      | -       | 85.0   | 1,6,54  | 87   | -     | -     | -    |
| <i>Notomys alexis</i>           | 102.5 | 6.5    | -      | 25.0  | -     | -      | -       | 70.0   | 1       | 35   | -     | -     | -    |
| <i>Notomys cervinus</i>         | 115   | 9.0    | -      | 26.0  | -     | -      | -       | 80.0   | 1       | 35   | -     | -     | -    |
| <i>Notomys fuscus</i>           | 106   | 7.0    | -      | 22.0  | -     | -      | -       | 77.0   | 1       | 35   | -     | -     | -    |
| <i>Notomys mitchelli</i>        | 98    | 9.0    | -      | 24.0  | -     | -      | -       | 65.0   | 1       | 52   | -     | -     | -    |
| <i>Ondatra zibethicus</i>       | 67.7  | -      | -      | -     | -     | -      | -       | -      | 1       | 1038 | 54    | -     | 24   |
| <i>Oryzomys palustris</i>       | 79.6  | 5.5    | 2.1    | -     | 0.90  | -      | -       | -      | 1       | -    | -     | -     | -    |
| <i>Ototylomys phyllotis</i>     | 137.4 | 5.5    | 2.4    | 94.6  | -     | -      | -       | -      | 1       | -    | -     | -     | -    |
| <i>Parahydromys asper</i>       | 120   | 8.0    | 2.5    | 22.0  | -     | -      | -       | 90.0   | 19      | 270  | -     | -     | -    |
| <i>Paraleptomys rufilatus</i>   | -     | 9.0    | 3.0    | -     | -     | -      | -       | -      | 19      | -    | -     | -     | -    |
| <i>Paruromys dominator</i>      | 141   | 11.0   | 6.5    | -     | -     | -      | -       | -      | 21      | -    | -     | -     | -    |
| <i>Pelomys harringtoni</i>      | -     | 8.7    | 3.2    | -     | -     | -      | -       | -      | 12      | -    | -     | -     | -    |
| <i>Peromyscus banderanus</i>    | 79.6  | 5.6    | 2.7    | 17.9  | -     | -      | -       | 55.8   | 1       | -    | -     | -     | -    |
| <i>Peromyscus boylei</i>        | 77.6  | 5.5    | 2.4    | 17.0  | -     | -      | -       | 55.1   | 1       | -    | -     | -     | -    |
| <i>Peromyscus californicus</i>  | 72    | 5.3    | -      | 15.2  | -     | -      | -       | 51.5   | 1       | 44   | -     | -     | -    |
| <i>Peromyscus crinitus</i>      | 78.8  | 5.2    | 2.8    | 19.0  | -     | -      | -       | 54.6   | 1       | -    | 48    | 8.3   | -    |
| <i>Peromyscus difficilis</i>    | 78.8  | 5.4    | 2.6    | 17.0  | -     | -      | -       | 56.4   | 1       | -    | -     | -     | -    |
| <i>Peromyscus eremicus</i>      | 76    | 5.9    | -      | 16.6  | -     | -      | -       | 53.5   | 1       | 24   | 48    | 11.19 | -    |
| <i>Peromyscus flavidus</i>      | 83.8  | 5.9    | 3.0    | 16.8  | -     | -      | -       | 61.2   | 1       | -    | -     | -     | -    |
| <i>Peromyscus floridanus</i>    | 77.3  | 5.3    | 2.7    | 16.0  | -     | -      | -       | 54.2   | 1       | -    | 48    | 5.86  | -    |
| <i>Peromyscus furvus</i>        | 77.3  | 5.3    | 2.5    | 17.2  | -     | -      | -       | 54.7   | 1       | -    | -     | -     | -    |
| <i>Peromyscus gossypinus</i>    | 86.1  | 5.4    | -      | 17.3  | -     | -      | -       | 63.4   | 1       | 28   | -     | -     | -    |
| <i>Peromyscus grandis</i>       | 79.6  | 5.3    | 2.5    | 17.7  | -     | -      | -       | 57.0   | 1       | -    | -     | -     | -    |
| <i>Peromyscus guatemalensis</i> | 82.2  | 5.5    | 2.6    | 18.2  | -     | -      | -       | 58.5   | 1       | -    | -     | -     | -    |
| <i>Peromyscus lepturus</i>      | 77.3  | 6.0    | 4.1    | 19.3  | -     | -      | -       | 52.0   | 1       | -    | -     | -     | -    |
| <i>Peromyscus leucopus</i>      | 77.3  | 4.4    | 2.2    | 0.9   | 17.36 | -      | -       | 72.0   | 1       | -    | -     | -     | -    |
| <i>Peromyscus lophurus</i>      | 76.5  | 6.2    | 4.9    | 19.7  | -     | -      | -       | 50.9   | 1       | -    | -     | -     | -    |
| <i>Peromyscus maniculatus</i>   | 75    | 5.2    | -      | 16.7  | -     | -      | -       | 53.1   | 1       | 20   | 48    | 8.47  | -    |
| <i>Peromyscus megalops</i>      | 73.4  | 5.1    | 2.6    | 19.5  | -     | -      | -       | 69.1   | 1       | -    | -     | -     | -    |
| <i>Peromyscus melanotis</i>     | 73.4  | 5.3    | 3.1    | 16.6  | -     | -      | -       | 51.5   | 1       | -    | -     | -     | -    |

| species                            | tot l | head l | head w | mid l | mid w | flag w | mit vol | flag l | source | b wt  | chrom | gen m | oest |
|------------------------------------|-------|--------|--------|-------|-------|--------|---------|--------|--------|-------|-------|-------|------|
| <i>Peromyscus mexicanus</i>        | 72    | 5.5    | 2.6    | 17.4  | -     | -      | -       | 49.4   | 1      | -     | -     | -     | -    |
| <i>Peromyscus nudipes</i>          | 78.8  | 5.5    | 2.6    | 17.2  | -     | -      | -       | 57.0   | 1      | -     | -     | -     | -    |
| <i>Peromyscus nuttalli</i>         | 67.7  | 4.2    | 3.0    | -     | 2.00  | -      | -       | -      | 1      | -     | -     | -     | -    |
| <i>Peromyscus pirrensis</i>        | 84.6  | 5.8    | 2.9    | 16.8  | -     | -      | -       | 62.4   | 1      | -     | -     | -     | -    |
| <i>Peromyscus polionotus</i>       | 76.5  | 5.4    | 3.1    | 15.3  | 1.41  | -      | -       | 54.2   | 1      | 15    | -     | -     | -    |
| <i>Peromyscus thomasi</i>          | 89.9  | 5.7    | 3.1    | 21.4  | -     | -      | -       | 63.1   | 1      | -     | -     | -     | -    |
| <i>Peromyscus truei</i>            | 78    | 5.4    | 2.6    | 16.1  | -     | -      | -       | 57.0   | 1      | -     | -     | -     | -    |
| <i>Peromyscus zarhynchus</i>       | 75.7  | 5.2    | 2.5    | 11.7  | -     | -      | -       | 52.5   | 1      | -     | -     | -     | -    |
| <i>Phodopus sungorus</i>           | 118.9 | 8.2    | 3.3    | 36.0  | 0.86  | 0.41   | 16.16   | 80.0   | 23     | 36    | -     | -     | 10   |
| <i>Pithecheir parvus</i>           | 91.5  | 7.5    | -      | 22.0  | -     | -      | -       | 62.0   | 6,54   | 103   | -     | -     | -    |
| <i>Pogonomys championi</i>         | 112.5 | 6.5    | 2.0    | 26.0  | -     | -      | -       | 80.0   | 19     | -     | -     | -     | -    |
| <i>Pogonomys loriae</i>            | 118   | 8.0    | 3.0    | 30.0  | -     | -      | -       | 80.0   | 19     | 95    | -     | -     | -    |
| <i>Pogonomys macrourus</i>         | -     | 5.5    | 2.0    | -     | -     | -      | -       | -      | 19     | 45    | -     | -     | -    |
| <i>Pseudohydromys murinus</i>      | -     | 8.5    | 3.0    | -     | -     | -      | -       | -      | 19     | 17    | -     | -     | -    |
| <i>Pseudomys apodemoides</i>       | 120   | 8.0    | -      | 22.0  | -     | -      | -       | 90.0   | 1      | 20    | -     | -     | -    |
| <i>Pseudomys australis</i>         | 122.5 | 9.0    | -      | 23.0  | -     | -      | -       | 90.5   | 1      | 65    | -     | -     | -    |
| <i>Pseudomys delicatulus</i>       | 88    | 4.0    | -      | 19.0  | 0.97  | 0.35   | 12.26   | 65.0   | 1,49   | 10    | -     | -     | -    |
| <i>Pseudomys fumeus</i>            | 128   | 8.0    | -      | 20.0  | -     | -      | -       | 100.0  | 1      | 70    | -     | -     | -    |
| <i>Pseudomys gracilicaudatus</i>   | 129.1 | 10.0   | -      | 21.0  | -     | -      | -       | 98.0   | 1      | 75    | -     | -     | -    |
| <i>Pseudomys hermannsburgensis</i> | 117   | 9.0    | -      | 23.0  | -     | -      | -       | 85.0   | 1      | 12    | -     | -     | -    |
| <i>Pseudomys higginsii</i>         | 106.4 | 8.0    | -      | 21.0  | -     | -      | -       | 77.5   | 1      | 67    | -     | -     | -    |
| <i>Pseudomys nanus</i>             | 127   | 9.0    | -      | 22.0  | -     | -      | -       | 96.0   | 1      | 34    | -     | -     | -    |
| <i>Pseudomys novaehollandiae</i>   | 106   | 6.0    | -      | 22.0  | 1.00  | 0.30   | 15.72   | 78.0   | 1,49   | 19    | -     | -     | -    |
| <i>Pseudomys shortridgei</i>       | 96    | 5.0    | 2.2    | 22.0  | 0.64  | 0.18   | 6.59    | 69.0   | 1,49   | 70    | -     | -     | -    |
| <i>Rattus argentiventer</i>        | 183   | 11.0   | -      | -     | -     | -      | -       | -      | 6,54   | 202   | -     | -     | -    |
| <i>Rattus colletti</i>             | 158   | 12.0   | -      | 51.0  | -     | -      | -       | 95.0   | 1      | 61    | -     | -     | -    |
| <i>Rattus everetti</i>             | 171.4 | 11.5   | 2.0    | -     | -     | -      | -       | -      | 2      | 254   | -     | -     | -    |
| <i>Rattus exulans</i>              | 176   | 12.0   | -      | -     | -     | -      | -       | -      | 1,6,54 | 53    | -     | -     | -    |
| <i>Rattus fuscipes</i>             | 162   | 12.0   | -      | 48.0  | -     | -      | -       | 102.0  | 1      | 125   | -     | -     | -    |
| <i>Rattus hoffmanni</i>            | 181.9 | 12.0   | 2.0    | -     | -     | -      | -       | -      | 21     | 147   | -     | -     | -    |
| <i>Rattus leucopus</i>             | -     | 12.0   | 2.0    | -     | -     | -      | -       | -      | 1,19   | 212   | -     | -     | -    |
| <i>Rattus lutreolus</i>            | 163   | 14.0   | -      | 54.0  | -     | -      | -       | 95.0   | 1      | 122   | -     | -     | -    |
| <i>Rattus marmosurus</i>           | 167   | 12.0   | 2.0    | -     | -     | -      | -       | -      | 19     | 216   | -     | -     | -    |
| <i>Rattus niobe</i>                | -     | 12.0   | 2.0    | -     | -     | -      | -       | -      | 19     | 44    | -     | -     | -    |
| <i>Rattus norvegicus</i>           | 190.1 | 12.1   | -      | 67.0  | 0.88  | 0.56   | 23.99   | 110.1  | 1,36   | 289   | 42    | 6.54  | -    |
| <i>Rattus rattus</i>               | 168.5 | 11.0   | 2.1    | 65.0  | -     | -      | -       | 90.0   | 1,6,54 | 132   | 42    | 6.54  | -    |
| <i>Rattus sordidus</i>             | 154.6 | 12.0   | -      | 49.5  | -     | -      | -       | 95.0   | 1      | 158   | -     | -     | -    |
| <i>Rattus steini</i>               | -     | 12.0   | 2.0    | -     | -     | -      | -       | -      | 19     | 15    | -     | -     | -    |
| <i>Rattus tiomanicus</i>           | 170.1 | 10.0   | -      | -     | -     | -      | -       | -      | 1,6,54 | 128   | -     | -     | -    |
| <i>Rattus verecundus</i>           | -     | 11.0   | 2.0    | -     | -     | -      | -       | -      | 19     | 60    | -     | -     | -    |
| <i>Rhabdomys pumilio</i>           | 117   | 10.0   | -      | 22.0  | -     | -      | -       | 85.0   | 1      | -     | -     | -     | -    |
| <i>Saccostomus campestris</i>      | 131   | 6.6    | -      | 22.0  | -     | -      | -       | 102.0  | 1,6    | 49    | -     | -     | -    |
| <i>Sigmodon hispidus</i>           | 87.2  | 6.5    | 3.2    | 17.9  | 0.90  | -      | -       | 61.8   | 1      | -     | -     | -     | -    |
| <i>Solomys salebrosus</i>          | 87    | 5.0    | 5.5    | 20.0  | -     | -      | -       | 62.0   | 19     | -     | -     | -     | -    |
| <i>Stenocephalemys</i> spp.        | -     | 10.0   | 2.0    | -     | -     | -      | -       | -      | 13     | -     | -     | -     | -    |
| <i>Stochomys longicaudatus</i>     | 67.5  | 4.5    | 2.0    | 8.0   | -     | -      | -       | 55.0   | 13     | 84    | -     | -     | -    |
| <i>Sundamys muelleri</i>           | 162   | 12.0   | -      | -     | -     | -      | -       | -      | 1,6,54 | 317   | -     | -     | -    |
| <i>Synaptomys cooperi</i>          | 99.7  | 7.7    | 4.0    | -     | 0.70  | -      | -       | -      | 1      | -     | -     | -     | -    |
| <i>Taeromys arcuatus</i>           | 176   | 11.0   | 3.0    | -     | -     | -      | -       | -      | 21     | 228   | -     | -     | -    |
| <i>Taeromys callitrichus</i>       | 118.9 | 9.0    | 4.0    | -     | -     | -      | -       | -      | 21     | 271   | -     | -     | -    |
| <i>Taeromys celebensis</i>         | 67    | 7.0    | 3.0    | -     | -     | -      | -       | -      | 21     | 323   | -     | -     | -    |
| <i>Taeromys hamatus</i>            | 107   | 7.0    | 4.0    | -     | -     | -      | -       | -      | 21     | 196   | -     | -     | -    |
| <i>Tateomys macrocerus</i>         | 135.5 | 10.5   | 2.0    | -     | -     | -      | -       | -      | 21     | 43    | -     | -     | -    |
| <i>Tateomys rhinogradoides</i>     | 129.5 | 9.5    | 2.0    | -     | -     | -      | -       | -      | 21     | 83    | -     | -     | -    |
| <i>Tatera leucogaster</i>          | 145.1 | 5.0    | -      | 30.0  | -     | -      | -       | 110.1  | 1      | -     | -     | -     | -    |
| <i>Tylomys gymmurus</i>            | 87.2  | 4.9    | 1.6    | 37.5  | -     | -      | -       | -      | 1      | -     | -     | -     | -    |
| <i>Tylomys panamensis</i>          | 87.2  | 5.5    | 1.6    | 33.8  | -     | -      | -       | -      | 1      | -     | -     | -     | -    |
| <i>Uranomys ruddi</i>              | 122   | 8.5    | 3.9    | 23.0  | -     | -      | -       | 90.0   | 13     | 34    | -     | -     | -    |
| <i>Uromys anak</i>                 | 110.9 | 8.0    | 3.0    | 21.0  | -     | -      | -       | 72.0   | 19     | 665   | -     | -     | -    |
| <i>Uromys caudimaculatus</i>       | 98    | 8.0    | 3.0    | 20.0  | -     | -      | -       | 70.0   | 1,19   | 557   | -     | -     | -    |
| <i>Uromys rex</i>                  | -     | 8.0    | 3.0    | -     | -     | -      | -       | -      | 19     | -     | -     | -     | -    |
| <i>Xenuromys barbatus</i>          | 164   | 12.0   | 3.0    | 27.0  | -     | -      | -       | 125.0  | 19     | 499   | -     | -     | -    |
| <i>Zyzomys argurus</i>             | 137   | 7.0    | -      | 22.0  | -     | -      | -       | 108.0  | 1      | 43    | -     | -     | -    |
| <b>Hystricidae</b>                 |       |        |        |       |       |        |         |        |        |       |       |       |      |
| <i>Hystrix africae australis</i>   | 28.3  | 3.0    | -      | 3.3   | -     | -      | -       | 18.7   | 6      | 14823 | -     | -     | -    |
| <b>Caviidae</b>                    |       |        |        |       |       |        |         |        |        |       |       |       |      |
| <i>Cavia porcellus</i>             | 114.1 | 10.9   | -      | 11.1  | 0.85  | 0.62   | 2.95    | 92.1   | 1,6,41 | 728   | 64    | 7.19  | 24   |
| <i>Galea musteloides</i>           | 44.2  | 5.4    | 5.7    | 5.9   | -     | -      | -       | 32.8   | 1      | 449   | -     | -     | -    |
| <b>Dasyproctidae</b>               |       |        |        |       |       |        |         |        |        |       |       |       |      |
| <i>Myoprocta pratti</i>            | 40.2  | 3.1    | 5.2    | 5.6   | -     | -      | -       | 31.5   | 1      | 600   | -     | -     | -    |

| species                            | tot l | head l | head w | mid l | mid w | flag w | mit vol | flag l | source    | b wt  | chrom | gen m | oest |
|------------------------------------|-------|--------|--------|-------|-------|--------|---------|--------|-----------|-------|-------|-------|------|
| <b>Chinchillidae</b>               |       |        |        |       |       |        |         |        |           |       |       |       |      |
| <i>Chinchilla laniger</i>          | 46.8  | 3.8    | -      | 4.7   | -     | -      | -       | 38.3   | 1,6       | 484   | 64    | 6.41  | 54   |
| <i>Lagidium boxi</i>               | 41.1  | 3.5    | 5.1    | 5.2   | -     | -      | -       | -      | 1         | -     | -     | -     | -    |
| <b>Capromyidae</b>                 |       |        |        |       |       |        |         |        |           |       |       |       |      |
| <i>Myocastor coypus</i>            | 41.6  | 6.0    | 4.3    | -     | -     | -      | -       | -      | 1,18      | 7502  | -     | -     | -    |
| <b>Octodontidae</b>                |       |        |        |       |       |        |         |        |           |       |       |       |      |
| <i>Octodon degus</i>               | 48.7  | 5.1    | -      | 5.9   | 0.59  | -      | -       | 36.7   | 1,6,47    | 210   | 58    | -     | -    |
| <i>Octodontomys glirrioides</i>    | 45.2  | 5.3    | 6.5    | 5.3   | -     | -      | -       | 34.6   | 1         | -     | -     | -     | -    |
| <b>Sciuridae</b>                   |       |        |        |       |       |        |         |        |           |       |       |       |      |
| <i>Sciurus niger</i>               | 122.2 | 12.1   | 11.6   | -     | 1.90  | -      | -       | -      | 1         | -     | -     | -     | -    |
| <i>Tamiasciurus hudsonicus</i>     | 131   | 14.0   | 12.2   | -     | 2.10  | -      | -       | -      | 1         | -     | -     | -     | -    |
| <b>Zapodontidae</b>                |       |        |        |       |       |        |         |        |           |       |       |       |      |
| <i>Zapus hudsonius</i>             | 76.1  | 5.1    | 2.9    | -     | 0.80  | -      | -       | -      | 1         | -     | -     | -     | -    |
| <b>Ctenomyidae</b>                 |       |        |        |       |       |        |         |        |           |       |       |       |      |
| <i>Ctenomys argentinus</i>         | 52.1  | 6.5    | 3.4    | 6.0   | -     | -      | -       | 39.6   | 6,14      | -     | -     | -     | -    |
| <i>Ctenomys australis</i>          | 96.8  | 12.7   | 5.5    | 9.0   | -     | -      | -       | 74.9   | 6,14      | 362   | -     | -     | -    |
| <i>Ctenomys conoveri</i>           | 52.4  | 6.3    | 3.3    | 6.1   | -     | -      | -       | 40.1   | 6,14      | 430   | -     | -     | -    |
| <i>Ctenomys dorbigny</i>           | 52.6  | 6.5    | 3.3    | 6.0   | -     | -      | -       | 40.1   | 6,14      | -     | -     | -     | -    |
| <i>Ctenomys fulvus</i>             | -     | 7.3    | 3.6    | 6.7   | -     | -      | -       | -      | 1         | 262   | 26    | -     | -    |
| <i>Ctenomys magellanicus</i>       | -     | 9.1    | 5.2    | 8.1   | -     | -      | -       | -      | 1         | 272   | 26    | -     | -    |
| <i>Ctenomys maulinus</i>           | 86    | 10.4   | 5.6    | 8.4   | -     | -      | -       | 67.0   | 1,17      | 215   | 36    | -     | -    |
| <i>Ctenomys mendocinus</i>         | 86.1  | 12.5   | 4.5    | 9.1   | -     | -      | -       | 67.4   | 6,14      | 178   | -     | -     | -    |
| <i>Ctenomys opimus</i>             | -     | 7.7    | 3.9    | 6.1   | -     | -      | -       | -      | 1         | 399   | 26    | -     | -    |
| <i>Ctenomys perrensis</i>          | 51.4  | 6.6    | 3.4    | 6.1   | -     | -      | -       | 38.7   | 6,14      | -     | -     | -     | -    |
| <i>Ctenomys porteousi</i>          | 83.7  | 12.2   | 5.5    | 9.1   | -     | -      | -       | 65.4   | 6,14      | -     | -     | -     | -    |
| <i>Ctenomys rionegrensis</i>       | 86.5  | 13.5   | 4.5    | 8.7   | -     | -      | -       | 67.1   | 6,14      | -     | -     | -     | -    |
| <i>Ctenomys robustus</i>           | -     | 7.1    | 3.8    | 6.1   | -     | -      | -       | -      | 1         | -     | -     | -     | -    |
| <i>Ctenomys talarum</i>            | 49.3  | 4.3    | 6.8    | 6.2   | -     | -      | -       | 38.9   | 1         | -     | -     | -     | -    |
| <i>Ctenomys yolandae</i>           | 85.5  | 10.5   | 4.6    | 8.5   | -     | -      | -       | 66.3   | 6,14      | -     | -     | -     | -    |
| <b>Echimyidae</b>                  |       |        |        |       |       |        |         |        |           |       |       |       |      |
| <i>Proechimys guairae</i>          | 37.4  | 3.2    | -      | 4.2   | -     | -      | -       | 30.0   | 1         | 399   | -     | -     | -    |
| <b>Gliridae</b>                    |       |        |        |       |       |        |         |        |           |       |       |       |      |
| <i>Glis glis</i>                   | 87    | -      | -      | -     | -     | -      | -       | -      | 1         | 125   | -     | -     | -    |
| <b>Dipodidae</b>                   |       |        |        |       |       |        |         |        |           |       |       |       |      |
| <i>Jaculus orientalis</i>          | 52    | -      | -      | -     | -     | -      | -       | -      | 1         | 12    | -     | -     | -    |
| <b>Geomyidae</b>                   |       |        |        |       |       |        |         |        |           |       |       |       |      |
| <i>Geomys pinetus</i>              | 110.5 | 4.5    | 2.2    | 1.1   | -     | -      | -       | -      | 1         | -     | -     | -     | -    |
| <b>Heteromyidae</b>                |       |        |        |       |       |        |         |        |           |       |       |       |      |
| <i>Liomys adspersus</i>            | -     | 3.2    | 2.8    | -     | -     | -      | -       | -      | 1         | -     | -     | -     | -    |
| <i>Liomys irroratus</i>            | -     | 5.4    | 2.0    | -     | -     | -      | -       | -      | 1         | -     | -     | -     | -    |
| <i>Liomys pictus</i>               | -     | 5.2    | 1.8    | -     | -     | -      | -       | -      | 1         | -     | -     | -     | -    |
| <i>Liomys salvini</i>              | -     | 3.2    | 3.0    | -     | -     | -      | -       | -      | 1         | -     | -     | -     | -    |
| <i>Liomys spectabilis</i>          | -     | 5.6    | 2.1    | -     | -     | -      | -       | -      | 1         | -     | -     | -     | -    |
| <b>MACROSCELIDEA</b>               |       |        |        |       |       |        |         |        |           |       |       |       |      |
| <b>Macroscelididae</b>             |       |        |        |       |       |        |         |        |           |       |       |       |      |
| <i>Elephantulus brachyrhynchus</i> | 66.7  | 6.9    | 3.4    | 10.8  | 1.10  | 0.73   | 5.72    | 48.9   | 6,38      | 45    | -     | -     | -    |
| <i>Elephantulus edwardii</i>       | 99.5  | 8.9    | 4.6    | 33.1  | 1.80  | 1.35   | 36.80   | 57.5   | 6,38      | 49    | -     | -     | -    |
| <i>Elephantulus intufi</i>         | 56.2  | 7.2    | 4.0    | 8.3   | 0.90  | -      | -       | 40.7   | 6,38      | 49    | -     | -     | -    |
| <i>Elephantulus myurus</i>         | 76.6  | 7.5    | 3.6    | 14.4  | 1.10  | 0.73   | 7.65    | 54.7   | 6,38      | 54    | -     | -     | -    |
| <i>Macroscelides proboscideus</i>  | 79    | 6.5    | 5.0    | 7.9   | 1.20  | -      | -       | 64.4   | 6,38      | 38    | -     | -     | -    |
| <i>Petrodromus tetradactylus</i>   | 79.9  | 6.3    | 3.9    | 5.7   | 0.90  | 0.40   | 2.91    | 67.7   | 6,38      | 188   | -     | -     | -    |
| <i>Rhynchocyon chrysopygus</i>     | 48.2  | 6.9    | 4.7    | 7.5   | 0.80  | 0.31   | 3.20    | 33.8   | 25        | 540   | -     | -     | -    |
| <b>PRIMATES</b>                    |       |        |        |       |       |        |         |        |           |       |       |       |      |
| <b>Cercopithecidae</b>             |       |        |        |       |       |        |         |        |           |       |       |       |      |
| <i>Cercocebus galeritus</i>        | 93.1  | 6.8    | -      | 13.3  | -     | -      | -       | 73.0   | 6         | 7839  | 42    | 7.33  | -    |
| <i>Cercopithecus aethiops</i>      | 94.6  | 7.5    | -      | 14.1  | 1.08  | 0.39   | 11.28   | 72.9   | 1,6,42    | 4807  | 60    | 8.62  | 792  |
| <i>Erythrocebus patas</i>          | 89.5  | 7.6    | -      | 12.6  | -     | -      | -       | 69.3   | 6         | 7273  | 54    | 7.34  | 305  |
| <i>Macaca arctoides</i>            | 89.4  | 6.7    | 3.4    | 12.7  | -     | -      | -       | 70.0   | 1,26      | 7502  | 42    | 7.21  | -    |
| <i>Macaca fascicularis</i>         | 77.1  | 6.6    | 3.5    | 12.9  | -     | -      | -       | 57.0   | 1,6,26    | 4328  | 42    | 7.2   | -    |
| <i>Macaca mulatta</i>              | 81.9  | 6.0    | 3.2    | 11.9  | 0.78  | 0.27   | 5.03    | 61.6   | 1,6,26,44 | 4646  | 42    | 7.49  | 226  |
| <i>Macaca nemestrina</i>           | 90.4  | 7.3    | -      | 13.3  | -     | -      | -       | 69.9   | 6         | 8118  | 42    | 7.42  | -    |
| <i>Macaca sinicus</i>              | 69.1  | -      | -      | -     | -     | -      | -       | -      | 1         | 3604  | -     | -     | -    |
| <i>Macaca thibetana</i>            | 73.7  | 5.5    | 3.5    | 11.1  | -     | -      | -       | 57.0   | 26        | 9255  | -     | -     | -    |
| <i>Papio anubis</i>                | 73    | 4.7    | -      | 8.2   | -     | -      | -       | 67.0   | 6         | 18123 | 42    | -     | -    |
| <i>Papio cynocephalus</i>          | 73.4  | 4.8    | -      | 9.9   | -     | -      | -       | 59.8   | 1,3,6     | 15168 | -     | -     | -    |
| <i>Papio sphinx</i>                | 71.5  | 5.7    | -      | 10.2  | -     | -      | -       | 55.8   | 1,6       | 18250 | 42    | 7.29  | -    |
| <i>Theropithecus gelada</i>        | 87.3  | 6.7    | -      | 12.1  | -     | -      | -       | 68.5   | 6         | 17051 | -     | -     | 210  |
| <b>Hylobatidae</b>                 |       |        |        |       |       |        |         |        |           |       |       |       |      |

| species                             | tot l | head l | head w | mid l | mid w | flag w | mit vol | flag l | source | b wt   | chrom | gen m | oest |
|-------------------------------------|-------|--------|--------|-------|-------|--------|---------|--------|--------|--------|-------|-------|------|
| <i>Hylobates lar</i>                | 63.5  | 6.9    | -      | 7.9   | -     | -      | -       | 48.8   | 6      | 5202   | 44    | 6.75  | -    |
| <b>Pongidae</b>                     |       |        |        |       |       |        |         |        |        |        |       |       |      |
| <i>Gorilla gorilla</i>              | 61.2  | 4.8    | -      | 11.7  | -     | -      | -       | 41.0   | 1      | 147413 | 48    | 7.45  | 24   |
| <i>Pan troglodytes</i>              | 69.9  | 5.3    | -      | 7.5   | 0.85  | 0.24   | 3.95    | 57.1   | 1,6,44 | 44890  | 48    | 7.57  | 144  |
| <i>Pongo pygmaeus</i>               | 66.6  | 5.3    | -      | 9.0   | -     | -      | -       | 52.3   | 1      | 56612  | 44    | 7.63  | 204  |
| <b>Hominidae</b>                    |       |        |        |       |       |        |         |        |        |        |       |       |      |
| <i>Homo sapiens</i>                 | 57.4  | 5.0    | -      | 4.7   | 0.74  | 0.26   | 1.78    | 48.4   | 1,6,42 | 63512  | 46    | 7.3   | -    |
| <b>Callithricidae</b>               |       |        |        |       |       |        |         |        |        |        |       |       |      |
| <i>Callithrix jacchus</i>           | 50    | 5.0    | -      | 4.4   | 0.64  | 0.21   | 1.24    | -      | 1,40   | 310    | 46    | 7.16  | 60   |
| <b>Cebidae</b>                      |       |        |        |       |       |        |         |        |        |        |       |       |      |
| <i>Cebus apella</i>                 | 84.1  | 8.4    | -      | 12.0  | -     | -      | -       | 63.8   | 6      | 2912   | 54    | 7.68  | 132  |
| <i>Saimiri sciurus</i>              | 69.2  | 5.1    | -      | 9.0   | 0.68  | 0.25   | 2.86    | 55.3   | 1,6,44 | 747    | 44    | 6.88  | 24   |
| <b>Daubentonidae</b>                |       |        |        |       |       |        |         |        |        |        |       |       |      |
| <i>Daubentonia madagascariensis</i> | 55.8  | 6.3    | -      | -     | -     | -      | -       | -      | 1      | 3010   | -     | -     | -    |
| <b>Lemuridae</b>                    |       |        |        |       |       |        |         |        |        |        |       |       |      |
| <i>Lemur catta</i>                  | 57.8  | 5.2    | -      | 10.3  | -     | -      | -       | 42.1   | 1,6    | 1960   | 56    | 6.49  | 24   |
| <i>Lemur macaco</i>                 | 54.9  | 7.1    | -      | 10.6  | -     | -      | -       | 37.3   | 6      | 2501   | 44    | -     | 25   |
| <i>Lemur mongoz</i>                 | 55.3  | 5.8    | -      | -     | -     | -      | -       | -      | 1      | 2100   | 46    | 7.73  | -    |
| <i>Lemur variegatus</i>             | 104.8 | 7.5    | -      | 20.7  | -     | -      | -       | 76.6   | 6      | 2998   | -     | -     | 21   |
| <i>Microcebus murinus</i>           | 93.6  | 8.1    | -      | -     | -     | -      | -       | -      | 1      | 65     | 66    | 6.5   | -    |
| <b>Galagidae</b>                    |       |        |        |       |       |        |         |        |        |        |       |       |      |
| <i>Galago crassicaudatus</i>        | 60.3  | 5.6    | -      | 9.5   | -     | -      | -       | 45.3   | 6      | 1090   | 62    | 8.3   | 139  |
| <i>Galago senegalensis</i>          | 61.2  | 4.9    | -      | 9.0   | 1.67  | 0.49   | 18.07   | 47.4   | 6,42   | 159    | 38    | 8.73  | 113  |
| <b>Lorisidae</b>                    |       |        |        |       |       |        |         |        |        |        |       |       |      |
| <i>Nycticebus coucang</i>           | 90    | 8.5    | -      | 13.5  | -     | -      | -       | 67.9   | 6      | 910    | 52    | 7.47  | -    |
| <b>SCANDENTIA</b>                   |       |        |        |       |       |        |         |        |        |        |       |       |      |
| <b>Tupaiidae</b>                    |       |        |        |       |       |        |         |        |        |        |       |       |      |
| <i>Tupaia glis</i>                  | 93.4  | 9.2    | -      | 14.0  | -     | -      | -       | 70.2   | 6      | 120    | 62    | 7.03  | 3    |
| <b>CHIROPTERA</b>                   |       |        |        |       |       |        |         |        |        |        |       |       |      |
| <b>Pteropodidae</b>                 |       |        |        |       |       |        |         |        |        |        |       |       |      |
| <i>Pteropus alecto</i>              | 65.6  | 6.4    | 4.8    | 19.2  | -     | -      | -       | 40.0   | 1      | 650    | -     | -     | -    |
| <i>Pteropus conspiculatus</i>       | 103   | 7.2    | 4.8    | 21.8  | 0.90  | 0.50   | 9.59    | 74.0   | 1,35   | 499    | -     | -     | -    |
| <i>Pteropus edwardsi</i>            | 108.9 | 9.0    | -      | -     | -     | -      | -       | -      | 1      | -      | -     | -     | -    |
| <i>Pteropus poliocephalus</i>       | 60.1  | 5.1    | 4.3    | 23.0  | 0.97  | 0.39   | 14.25   | 32.0   | 1,35   | 677    | -     | -     | -    |
| <i>Pteropus scapulatus</i>          | 103.8 | 8.0    | 4.9    | 22.5  | 1.00  | -      | -       | 73.4   | 1      | 358    | -     | -     | -    |
| <i>Syconycteris australis</i>       | 80.6  | 6.2    | 4.8    | 22.4  | 0.96  | 0.48   | 12.17   | 52.0   | 1,35   | 17     | -     | -     | -    |
| <b>Rhinolophidae</b>                |       |        |        |       |       |        |         |        |        |        |       |       |      |
| <i>Rhinolophus cornutus</i>         | -     | 9.0    | -      | 12.8  | -     | -      | -       | -      | 6      | -      | -     | -     | -    |
| <i>Rhinolophus ferrumequinum</i>    | -     | 6.4    | -      | 18.6  | -     | -      | -       | -      | 6      | 14     | 58    | 4.08  | -    |
| <b>Phyllostomidae</b>               |       |        |        |       |       |        |         |        |        |        |       |       |      |
| <i>Anoura cultrata</i>              | 62.6  | 5.0    | 4.4    | 7.8   | 0.76  | -      | -       | 50.7   | 1      | 18     | -     | -     | -    |
| <i>Artibeus jamaicensis</i>         | -     | 3.8    | 3.4    | 8.3   | 0.62  | -      | -       | -      | 1      | 44     | 31    | -     | -    |
| <i>Artibeus lituratus</i>           | 85.7  | 4.5    | 3.5    | 9.4   | 0.96  | -      | -       | 71.9   | 1      | 61     | 31    | -     | -    |
| <i>Carollia castanea</i>            | 64.2  | 4.8    | 4.0    | 9.9   | 0.88  | -      | -       | 49.5   | 1      | 7      | 22    | -     | -    |
| <i>Glossophaga soricina</i>         | -     | 4.0    | -      | 7.9   | -     | -      | -       | -      | 1      | 9      | 22    | -     | -    |
| <i>Phyllostomus discolor</i>        | -     | 5.4    | 4.2    | 9.1   | 0.61  | -      | -       | -      | 1      | 37     | -     | -     | -    |
| <i>Sturnira lilium</i>              | -     | 4.2    | 3.8    | 9.2   | 0.82  | -      | -       | -      | 1      | 19     | 30    | -     | -    |
| <i>Sturnira ludovici</i>            | -     | 4.6    | 3.8    | 10.5  | 0.99  | -      | -       | -      | 1      | 25     | -     | -     | -    |
| <b>Molossidae</b>                   |       |        |        |       |       |        |         |        |        |        |       |       |      |
| <i>Mormopterus planiceps</i>        | 66    | 6.0    | -      | 8.0   | -     | -      | -       | 52.0   | 1      | 12     | -     | -     | 1465 |
| <b>Vespertilionidae</b>             |       |        |        |       |       |        |         |        |        |        |       |       |      |
| <i>Antrozous pallidus</i>           | 58.6  | 3.6    | 2.5    | 12.0  | 2.15  | -      | -       | 43.0   | 1      | 23     | 46    | -     | 4754 |
| <i>Chalinolobus gouldii</i>         | 58    | 4.0    | -      | 9.0   | -     | -      | -       | 45.0   | 1      | 14     | -     | -     | 2927 |
| <i>Chalinolobus morio</i>           | 45    | 4.0    | -      | 6.5   | -     | -      | -       | 34.5   | 1      | 9      | -     | -     | 1465 |
| <i>Eptesicus fuscus</i>             | 72    | 5.0    | 2.0    | 9.0   | 0.62  | 0.30   | 2.10    | 58.0   | 1,43   | 17     | 50    | 4.7   | 4380 |
| <i>Lasiurus noctivagans</i>         | 73.4  | 5.5    | 2.0    | 8.9   | 0.80  | -      | -       | 59.0   | 1      | 10     | -     | -     | -    |
| <i>Lasiurus borealis</i>            | 67.1  | 5.3    | 2.0    | 11.2  | 0.80  | -      | -       | 50.6   | 1      | 11     | -     | -     | 5112 |
| <i>Miniopterus schreibersii</i>     | -     | 11.0   | -      | 10.3  | -     | -      | -       | -      | 1,6    | 12     | 46    | 3.61  | 864  |
| <i>Myotis austroriparius</i>        | 49    | 4.6    | 1.9    | 12.8  | 1.20  | -      | -       | 31.6   | 1      | 7      | 44    | -     | -    |
| <i>Myotis evotis</i>                | -     | 4.9    | 2.1    | 15.1  | 1.33  | -      | -       | -      | 1      | -      | 44    | -     | -    |
| <i>Myotis grisescens</i>            | 72.6  | 5.8    | 2.5    | 18.6  | 1.83  | -      | -       | 48.2   | 1      | 11     | 44    | -     | 720  |
| <i>Myotis keeni</i>                 | 68.6  | 4.5    | 1.9    | 15.5  | 1.18  | -      | -       | 45.9   | 1      | 6      | 44    | -     | -    |
| <i>Myotis lucifugus</i>             | 51    | 4.3    | 1.8    | 12.7  | 1.18  | 0.35   | 12.66   | 34.0   | 1,43   | 8      | 44    | -     | 5112 |
| <i>Myotis macrodactylus</i>         | -     | 6.2    | -      | 16.6  | -     | -      | -       | -      | 6      | -      | 44    | -     | -    |
| <i>Myotis nattereri</i>             | -     | 6.8    | -      | 17.7  | -     | -      | -       | -      | 6      | 7      | 44    | -     | -    |
| <i>Myotis nigricans</i>             | -     | 4.7    | 2.2    | 17.6  | 1.34  | -      | -       | -      | 1      | 4      | 44    | -     | -    |
| <i>Myotis sodalis</i>               | 65.5  | 4.9    | 1.8    | 13.7  | 1.00  | -      | -       | 46.9   | 1      | 6      | 44    | -     | 4368 |
| <i>Myotis velifer</i>               | -     | 4.0    | 1.8    | 23.9  | 1.70  | -      | -       | -      | 1      | 9      | -     | -     | -    |

| species                          | tot l | head l | head w | mid l | mid w | flag w | mit vol | flag l | source  | b wt    | chrom | gen m | oest |
|----------------------------------|-------|--------|--------|-------|-------|--------|---------|--------|---------|---------|-------|-------|------|
| <i>Myotis volans</i>             | -     | 5.3    | 2.0    | 15.9  | 1.12  | -      | -       | -      | 1       | 8       | -     | -     | -    |
| <i>Nycticeius humeralis</i>      | 77.3  | 5.2    | 2.1    | 10.8  | 2.10  | -      | -       | 61.3   | 1       | 9       | 46    | -     | 5112 |
| <i>Nyctophilus geoffroyi</i>     | 53    | 4.0    | -      | 6.0   | -     | -      | -       | 43.0   | 1       | 6       | -     | -     | 2928 |
| <i>Nyctophilus timoriensis</i>   | 52    | 4.0    | -      | 8.0   | -     | -      | -       | 40.0   | 1       | 17      | -     | -     | 2928 |
| <i>Pipistrellus abramus</i>      | -     | 6.1    | -      | 18.1  | -     | -      | -       | -      | 6       | 6       | -     | -     | -    |
| <i>Pipistrellus subflavus</i>    | 79.1  | 5.6    | 2.3    | 10.4  | 0.81  | -      | -       | 70.0   | 1       | 6       | 30    | -     | 5112 |
| <i>Pipistrellus tasmaniensis</i> | 66    | 6.0    | -      | 8.0   | -     | -      | -       | 52.0   | 1       | 11      | -     | -     | -    |
| <i>Plecotus rafinesquii</i>      | 54.6  | 4.3    | 2.1    | 9.3   | 1.26  | -      | -       | 41.1   | 1       | 9       | -     | -     | 2472 |
| <i>Plecotus townsendii</i>       | -     | 5.6    | 2.8    | 12.6  | 1.52  | -      | -       | -      | 1       | 10      | -     | -     | -    |
| <b>INSECTIVORA</b>               |       |        |        |       |       |        |         |        |         |         |       |       |      |
| <b>Erinaceidae</b>               |       |        |        |       |       |        |         |        |         |         |       |       |      |
| <i>Erinaceus europaeus</i>       | 90    | 6.0    | -      | -     | -     | -      | -       | -      | 6       | 857     | 48    | 7.64  | -    |
| <b>Tenrecidae</b>                |       |        |        |       |       |        |         |        |         |         |       |       |      |
| <i>Tenrec eucaudatus</i>         | 64    | -      | -      | -     | -     | -      | -       | -      | 1       | 831     | 38    | -     | -    |
| <i>Setifer setosus</i>           | 64    | -      | -      | -     | -     | -      | -       | -      | 1       | 225     | -     | -     | -    |
| <b>Soricidae</b>                 |       |        |        |       |       |        |         |        |         |         |       |       |      |
| <i>Blarina brevicaudatus</i>     | 70    | -      | -      | -     | -     | -      | -       | -      | 27      | 15      | 50    | -     | 72   |
| <i>Chimarrigale himalayica</i>   | 83.1  | 6.1    | 2.9    | 41.0  | 0.80  | 0.39   | 15.71   | 36.0   | 27      | 16      | -     | -     | -    |
| <i>Crocodyura dsinezumi</i>      | 104   | 14.0   | 11.5   | 55.0  | 0.76  | 0.43   | 16.96   | 34.9   | 6       | 10      | -     | -     | -    |
| <i>Crocodyura russula</i>        | -     | -      | -      | -     | -     | -      | -       | -      | 6,50    | 10      | -     | -     | -    |
| <i>Sorex araneus</i>             | -     | 5.5    | -      | 27.0  | 1.09  | 0.80   | 11.80   | -      | 27      | 7       | 23    | -     | 2    |
| <i>Sorex shinto</i>              | 67.7  | 5.7    | 4.0    | 32.0  | -     | -      | -       | 29.9   | 1,27,51 | 6       | -     | -     | -    |
| <i>Suncus murinus</i>            | 121.7 | 20.8   | 17.1   | 41.5  | 1.12  | 0.66   | 26.48   | 80.0   | 6,51    | 45      | 40    | -     | -    |
| <b>Talpidae</b>                  |       |        |        |       |       |        |         |        |         |         |       |       |      |
| <i>Talpa europaea</i>            | 116   | 9.0    | -      | -     | 1.01  | 0.45   | -       | -      | 1,52    | 85      | 34    | -     | 25   |
| <b>CARNIVORA</b>                 |       |        |        |       |       |        |         |        |         |         |       |       |      |
| <b>Canidae</b>                   |       |        |        |       |       |        |         |        |         |         |       |       |      |
| <i>Canis familiaris</i>          | 60.7  | 6.1    | 4.3    | 10.8  | 1.47  | -      | -       | 46.2   | 1,6,24  | 15002   | 78    | 7.1   | 348  |
| <i>Canis lupus</i>               | 61.6  | 6.8    | 4.3    | 10.8  | 1.41  | -      | -       | 43.8   | 6       | 42872   | -     | -     | 264  |
| <i>Vulpes vulpes</i>             | 64    | 7.6    | 5.0    | 12.4  | 1.46  | -      | -       | 48.6   | 6       | 4428    | 34    | -     | 56   |
| <b>Ursidae</b>                   |       |        |        |       |       |        |         |        |         |         |       |       |      |
| <i>Ailuropoda melanoleuca</i>    | 51.2  | 5.0    | 4.2    | 7.2   | 0.80  | -      | -       | 39.0   | 1       | 92502   | -     | -     | 236  |
| <i>Melursus ursinus</i>          | 72.5  | -      | -      | -     | -     | -      | -       | -      | 6       | 97830   | -     | -     | -    |
| <i>Tremarctos ornatus</i>        | 73.1  | -      | -      | -     | -     | -      | -       | -      | 6       | 140083  | -     | -     | -    |
| <i>Ursus arctos</i>              | 73.8  | 7.4    | 4.0    | 11.5  | -     | -      | -       | 59.3   | 6       | 204433  | -     | -     | 648  |
| <b>Mustelidae</b>                |       |        |        |       |       |        |         |        |         |         |       |       |      |
| <i>Martes foina</i>              | 70.3  | 7.0    | 5.3    | 11.5  | 1.54  | -      | -       | 54.4   | 6       | 1700    | -     | -     | -    |
| <i>Meles meles</i>               | 80    | -      | -      | -     | -     | -      | -       | -      | 1       | 9227    | -     | -     | -    |
| <i>Mustela erminea</i>           | -     | -      | -      | -     | -     | -      | -       | -      | -       | 250     | -     | -     | -    |
| <i>Mustela eversmanni</i>        | 78.6  | 8.0    | 6.3    | 13.3  | 1.70  | -      | -       | 57.2   | 6       | 1700    | -     | -     | 984  |
| <i>Mustela nigripes</i>          | -     | 5.0    | 4.5    | -     | -     | -      | -       | -      | 28      | 790     | -     | -     | 888  |
| <i>Mustela putorius</i>          | -     | 5.7    | 4.2    | -     | -     | -      | -       | -      | 28      | 900     | -     | -     | -    |
| <i>Mustela vison</i>             | 43    | 7.0    | -      | 6.0   | -     | -      | -       | 30.0   | 1       | 1007    | 30    | -     | 216  |
| <b>Viverridae</b>                |       |        |        |       |       |        |         |        |         |         |       |       |      |
| <i>Cryptoprocta ferox</i>        | 69    | -      | -      | -     | -     | -      | -       | -      | 1       | 3501    | -     | -     | -    |
| <i>Eupleres goudotii</i>         | 45    | -      | -      | -     | -     | -      | -       | -      | 1       | 2998    | -     | -     | -    |
| <b>Felidae</b>                   |       |        |        |       |       |        |         |        |         |         |       |       |      |
| <i>Acinonyx jubatus</i>          | 56    | 5.4    | 3.3    | 10.0  | -     | -      | -       | 40.0   | 6       | 47239   | -     | -     | 336  |
| <i>Felis catus</i>               | 59.5  | 5.4    | -      | 8.4   | -     | -      | -       | 45.6   | 1,6     | 3900    | 38    | -     | 122  |
| <i>Panthera pardus</i>           | 62.1  | 4.7    | 2.4    | 12.8  | 0.55  | 0.24   | 2.46    | 44.0   | 29      | 37420   | -     | -     | 170  |
| <i>Panthera tigris</i>           | 43.63 | 5.8    | 3.6    | -     | -     | -      | -       | -      | 1       | 117007  | -     | -     | -    |
| <b>PINNIPEDIA</b>                |       |        |        |       |       |        |         |        |         |         |       |       |      |
| <b>Otariidae</b>                 |       |        |        |       |       |        |         |        |         |         |       |       |      |
| <i>Callorhinus ursinus</i>       | 54.1  | 6.0    | -      | 6.7   | -     | -      | -       | 41.5   | 6       | 105661  | 36    | -     | 720  |
| <b>Phocidae</b>                  |       |        |        |       |       |        |         |        |         |         |       |       |      |
| <i>Mirounga leonina</i>          | 73.7  | 4.8    | 3.0    | 5.3   | 0.50  | -      | -       | 63.6   | 1       | 1862086 | -     | -     | 108  |
| <i>Phoca vitulina</i>            | 68    | 6.0    | -      | 12.0  | -     | -      | -       | 50.0   | 6       | 123129  | 32    | -     | 840  |
| <i>Halichoerus grypus</i>        | 53    | -      | -      | -     | -     | -      | -       | -      | 1       | -       | -     | -     | -    |
| <b>ARTIODACTYLA</b>              |       |        |        |       |       |        |         |        |         |         |       |       |      |
| <b>Suidae</b>                    |       |        |        |       |       |        |         |        |         |         |       |       |      |
| <i>Phacochoerus aethiopicus</i>  | -     | 8.9    | 5.1    | -     | -     | -      | -       | -      | 16      | 52417   | -     | -     | -    |
| <i>Sus scrofa</i>                | 47.3  | 8.1    | 5.0    | 10.9  | -     | -      | -       | 28.8   | 1,16    | 39339   | 38    | 6.57  | 39   |
| <b>Tayassuidae</b>               |       |        |        |       |       |        |         |        |         |         |       |       |      |
| <i>Tayassu tajacu</i>            | 40    | -      | -      | -     | -     | -      | -       | -      | 1       | 21120   | 30    | -     | 84   |
| <b>Hippopotamidae</b>            |       |        |        |       |       |        |         |        |         |         |       |       |      |
| <i>Hippopotamus amphibius</i>    | 33.5  | 3.8    | 2.7    | 7.9   | -     | -      | -       | 21.9   | 1       | 1406045 | -     | -     | 126  |

| species                         | tot l | head l | head w | mid l | mid w | flag w | mit vol | flag l | source    | b wt     | chrom | gen m | oest |
|---------------------------------|-------|--------|--------|-------|-------|--------|---------|--------|-----------|----------|-------|-------|------|
| <b>Camelidae</b>                |       |        |        |       |       |        |         |        |           |          |       |       |      |
| <i>Camelus bactrianus</i>       | 42.9  | 6.0    | 3.8    | 6.2   | -     | -      | -       | 30.8   | 6         | 495339   | 74    | 5.96  | 72   |
| <i>Camelus dromedarius</i>      | 48.6  | 5.6    | 3.6    | 6.9   | 0.87  | 0.43   | 3.08    | 35.3   | 1,6,33    | 414985   | 74    | 6.19  | 105  |
| <i>Llama glama</i>              | 49.47 | 5.3    | 3.8    | 5.3   | -     | -      | -       | 36.6   | 6         | 81450    | -     | -     | -    |
| <b>Cervidae</b>                 |       |        |        |       |       |        |         |        |           |          |       |       |      |
| <i>Alces alces</i>              | 62.5  | 8.8    | 5.2    | -     | -     | -      | -       | -      | 1         | 225482   | 70    | -     | 108  |
| <i>Axis axis</i>                | 66.2  | 8.9    | 6.3    | 13.8  | -     | -      | -       | 43.6   | 30        | 68459    | -     | -     | -    |
| <i>Cervus duvauceli</i>         | 68.4  | 9.7    | 7.0    | 13.1  | -     | -      | -       | 45.0   | 30        | 175430   | -     | -     | -    |
| <i>Cervus eldithamin</i>        | 74.6  | 8.8    | 5.5    | 13.3  | -     | -      | -       | 49.8   | 30        | 122515   | -     | -     | -    |
| <i>Cervus elephas</i>           | 57    | -      | -      | -     | -     | -      | -       | -      | 1         | 107688   | 68    | -     | -    |
| <i>Cervus nippon</i>            | 64.8  | 8.7    | 5.8    | 12.1  | -     | -      | -       | 44.8   | 30        | 23248    | -     | -     | 108  |
| <i>Dama dama</i>                | 67.2  | 8.2    | 4.4    | 13.7  | 0.50  | -      | -       | 47.3   | 6         | 70051    | 68    | -     | -    |
| <i>Elaphurus davidianus</i>     | 61.5  | 8.7    | 5.3    | 11.3  | -     | -      | -       | 42.2   | 30        | 186464   | -     | -     | -    |
| <i>Mazama americana</i>         | 60.5  | 8.5    | 4.8    | 11.0  | -     | -      | -       | 40.8   | 30        | 22810    | -     | -     | -    |
| <i>Odocoileus virginianus</i>   | 52    | 10.0   | 6.0    | 7.0   | -     | -      | -       | 35.0   | 1         | 66902    | 70    | -     | 30   |
| <i>Rangifer tarandus</i>        | 56.5  | 7.6    | 5.0    | 10.4  | -     | -      | -       | 38.5   | 1         | 95510    | 70    | -     | 48   |
| <b>Giraffidae</b>               |       |        |        |       |       |        |         |        |           |          |       |       |      |
| <i>Giraffa camelopardalis</i>   | 47.8  | 5.8    | 3.8    | -     | -     | -      | -       | -      | 1         | 1009252  | 30    | -     | 12   |
| <b>Bovidae</b>                  |       |        |        |       |       |        |         |        |           |          |       |       |      |
| <i>Aepyceros melampus</i>       | 46.1  | 6.5    | 4.1    | 7.6   | -     | -      | -       | 32.0   | 1         | 49810    | 60    | -     | 36   |
| <i>Alcelaphus buselaphus</i>    | 48.4  | 4.8    | 3.1    | 7.2   | -     | -      | -       | 36.3   | 1         | 135672   | -     | -     | -    |
| <i>Bos taurus</i>               | 62.5  | 8.0    | 4.3    | 12.2  | 0.63  | 0.27   | 3.09    | 42.2   | 1,6,30,39 | 725052   | 60    | 7.72  | 18   |
| <i>Bubalus bubalis</i>          | 57    | 9.5    | 5.1    | 14.2  | -     | -      | -       | 33.4   | 1         | 725052   | -     | -     | 26   |
| <i>Capra hircus</i>             | 59.4  | 8.3    | -      | 11.4  | -     | -      | -       | 39.7   | 1         | 33489    | 60    | 6.76  | 26   |
| <i>Capra ibex</i>               | 70.2  | 8.5    | 4.5    | 20.0  | -     | -      | -       | 42.5   | 1         | 70192    | -     | -     | 48   |
| <i>Cephalophus abyssinicus</i>  | 68    | -      | -      | -     | -     | -      | -       | -      | 1         | -        | -     | -     | -    |
| <i>Connochaetes taurinus</i>    | 46.8  | 5.0    | 3.6    | 7.9   | -     | -      | -       | 33.9   | 1,6       | 190421   | 58    | -     | -    |
| <i>Damaliscus dorcas</i>        | 50.8  | 4.5    | 3.0    | 7.7   | -     | -      | -       | 38.6   | 1         | 63258    | 38    | -     | 12   |
| <i>Damaliscus lunatus</i>       | -     | 6.8    | 4.6    | -     | -     | -      | -       | -      | 28        | 130613   | -     | -     | -    |
| <i>Gazella dorcas</i>           | 66.5  | 7.4    | 3.7    | 11.1  | -     | -      | -       | 48.0   | 6         | -        | 31    | -     | -    |
| <i>Gazella granti</i>           | 48    | -      | -      | -     | -     | -      | -       | -      | 1         | 47619    | -     | -     | -    |
| <i>Hippotragus niger</i>        | -     | 7.0    | 4.5    | -     | -     | -      | -       | -      | 16        | 180953   | -     | -     | -    |
| <i>Litocranius walleri</i>      | 35    | -      | -      | -     | -     | -      | -       | -      | 1         | 25008    | -     | -     | -    |
| <i>Ovis aries</i>               | 55.2  | 7.5    | 4.3    | 12.1  | 0.81  | 0.38   | 4.88    | 42.5   | 1,48      | 84964    | 54    | 6.88  | 35   |
| <i>Redunca fulvorufula</i>      | -     | 6.1    | 3.9    | -     | -     | -      | -       | -      | 16        | 29377    | -     | -     | -    |
| <i>Syncerus caffer</i>          | 71.4  | 5.9    | 3.1    | 10.6  | 0.73  | 0.42   | 2.97    | 55.1   | 3,31      | 488941   | -     | -     | -    |
| <i>Tragelaphus angasi</i>       | -     | 9.3    | 5.9    | -     | -     | -      | -       | -      | 16        | 85733    | -     | -     | -    |
| <i>Tragelaphus strepsiceros</i> | 45.5  | 6.4    | 3.8    | 9.0   | -     | -      | -       | 30.3   | 1         | 192528   | 31    | -     | -    |
| <b>CETACEA</b>                  |       |        |        |       |       |        |         |        |           |          |       |       |      |
| <b>Delphinidae</b>              |       |        |        |       |       |        |         |        |           |          |       |       |      |
| <i>Globicephala melas</i>       | 67    | -      | -      | -     | -     | -      | -       | -      | 1         | 2697738  | -     | -     | -    |
| <i>Tursiops truncatus</i>       | 64.5  | 4.5    | -      | 4.0   | -     | -      | -       | 56.0   | 1         | 152511   | 44    | -     | -    |
| <b>Physeteridae</b>             |       |        |        |       |       |        |         |        |           |          |       |       |      |
| <i>Phocoena communis</i>        | 73.8  | -      | -      | -     | -     | -      | -       | -      | 1         | 52522    | -     | -     | -    |
| <i>Physeter catodon</i>         | 45.5  | -      | -      | -     | -     | -      | -       | -      | 1         | 20875000 | -     | -     | -    |
| <b>Balaenopteridae</b>          |       |        |        |       |       |        |         |        |           |          |       |       |      |
| <i>Megaptera novaeangliae</i>   | 56    | -      | -      | -     | -     | -      | -       | -      | 1         | 30060762 | -     | -     | -    |
| <b>PERISSODACTYLA</b>           |       |        |        |       |       |        |         |        |           |          |       |       |      |
| <b>Equidae</b>                  |       |        |        |       |       |        |         |        |           |          |       |       |      |
| <i>Equus asinus</i>             | 64.1  | 6.9    | -      | 9.9   | -     | -      | -       | 47.3   | 1         | 325135   | 62    | -     | -    |
| <i>Equus burchelli</i>          | -     | 5.3    | 2.8    | -     | -     | -      | -       | -      | 16        | 284360   | -     | -     | 144  |
| <i>Equus caballus</i>           | 60.6  | 6.8    | 3.3    | 9.8   | -     | -      | -       | 43.8   | 1         | 530194   | 64    | 7     | 136  |
| <i>Equus grevyi</i>             | 50    | -      | -      | -     | -     | -      | -       | -      | 1         | 341123   | 46    | -     | -    |
| <b>HYRACOIDEA</b>               |       |        |        |       |       |        |         |        |           |          |       |       |      |
| <b>Procaviidae</b>              |       |        |        |       |       |        |         |        |           |          |       |       |      |
| <i>Procavia capensis</i>        | -     | 11.5   | 5.5    | 12.0  | 1.50  | -      | -       | -      | 1,16      | 3095     | -     | -     | -    |
| <b>PROBOSCIDEA</b>              |       |        |        |       |       |        |         |        |           |          |       |       |      |
| <i>Elephas maximus</i>          | 59    | 7.5    | -      | 10.6  | -     | -      | -       | 40.0   | 1         | 1905000  | -     | -     | 96   |
| <i>Loxodonta africana</i>       | 60.9  | 6.8    | 3.5    | 9.7   | -     | -      | -       | 42.8   | 1,16,32   | 2540972  | -     | -     | 90   |
